# Supplementary material for: Metabolomic Characterization of Phoradendron brachystachyum Mistletoe and In-Silico and In-Vitro Investigation of Its Therapeutic Potential in Metabolic Disorders
Source: MDPI journal article supplement (doi:10.3390/plants12142729), 2023-07-22
Supplement: s1 [file s1]

**Table S1. List of putatively annotated metabolites (SIRIUS 4.9.12) in mistletoe by anatomical site.**

| ID | Name                                                                                                                                                                         | Annotation Tool | Superclass                      | Class                               | Subclass                  | Molecular Formula | Adduct                                  | Theoretical mass | Experimental mass | Mass accuracy (ppm) | Retention time (min) | Location    |
|----|------------------------------------------------------------------------------------------------------------------------------------------------------------------------------|-----------------|---------------------------------|-------------------------------------|---------------------------|-------------------|-----------------------------------------|------------------|-------------------|---------------------|----------------------|-------------|
| 1  | 2-[2-hexyl-2-[[3,4,5-trihydroxy-6-(hydroxymethyl)oxan-2-yl]oxymethyl]octoxy]-6-(hydroxymethyl)oxane-3,4,5-triol                                                              | CSI:FingerID    | Lipids and lipid-like molecules | Fatty Acyls                         | Fatty acyl glycosides     | C27H52O12         | [M + H] <sup>+</sup>                    | 569.3531         | 569.3488          | -7.4461             | 18.2127              | Aerial Leaf |
| 2  | 9-[1-[3,5-bis(hydroxymethyl)-4-methyloxolan-2-yl]-1,2-dihydroxypropan-2-yl]-8,23-dimethyl-17-phenyl-13,19-dioxapentacyclo[18.3.1.0?,??,0?,??.0?,??]tetracos-3-en-15-yn-2-one | CSI:FingerID    | Lipids and lipid-like molecules | Steroids and steroid derivatives    | Ecdysteroids              | C40H54O8          | [M - H <sub>2</sub> O + H] <sup>+</sup> | 645.3791         | 645.3808          | 2.5934              | 24.0667              | Aerial Leaf |
| 3  | 5-[[4-[4-[[2,6-diamino-3-[(4-sulfophenyl)diazenyl]phenyl]diazenyl]-3-methylphenyl]-2-methylphenyl]diazenyl]-2-hydroxybenzoic acid                                            | CSI:FingerID    | Benzenoids                      | Benzene and substituted derivatives | Biphenyls and derivatives | C33H28N8O6S       | [M + K] <sup>+</sup>                    | 703.149          | 703.15            | 1.5376              | 16.1511              | Aerial Leaf |

|   |                                                                                                                                                                                     |              |                                         |                                  |                                      |             |                            |          |          |         |         |                  |
|---|-------------------------------------------------------------------------------------------------------------------------------------------------------------------------------------|--------------|-----------------------------------------|----------------------------------|--------------------------------------|-------------|----------------------------|----------|----------|---------|---------|------------------|
| 4 | (2-(4-(2-(5-amino-1H-pyrrol-2-yl)ethoxy)phenyl)-7-((6-carboxy-3,4,5-trihydroxytetrahydro-2H-pyran-2-yl)oxy)-6-((3-ethyl-5-hydroxybenzyl)oxy)-5-hydroxy-4H-chromen-4-ylidene)oxonium | CSI:FingerID | Phenylpropanoids and polyketides        | Flavonoids                       | Flavonoid glycosides                 | C36H36N2O13 | [M + Na] <sup>+</sup>      | 727.2115 | 727.2071 | -6.0539 | 12.0242 | Aerial Leaf      |
| 5 | Nicotiflorin                                                                                                                                                                        | GNPS         | Phenylpropanoids and polyketides        | Flavonoids                       | Flavonoid glycosides                 | C27H30O15   | [M + H] <sup>+</sup>       | 595.1657 | 595.1656 | -0.0786 | 12.831  | Aerial Leaf      |
| 6 | PA(14:1(9Z)/18:4(6Z,9Z,12Z,15Z))                                                                                                                                                    | MolDiscovery | Lipids and lipid-like molecules         | Glycerophospholipids             | Glycerophosphates                    | C35H59O8P   | [M + H] <sup>+</sup>       | 639.402  | 639.396  | -9.3142 | 18.5547 | Aerial Leaf      |
| 7 | 2-[[2-[[2-[(2-amino-3-phenylpropanoyl)amino]-3-methylbutanoyl]amino]-3-methylbutanoyl]amino]-3-(4-hydroxyphenyl)propanoic acid                                                      | CSI:FingerID | Organic acids and derivatives           | Carboxylic acids and derivatives | Amino acids, peptides, and analogues | C28H38N4O6  | [M - H2O + H] <sup>+</sup> | 509.2764 | 509.2741 | -4.4688 | 24.0333 | Aerial Stem      |
| 8 | 1,3-dimethylxanthosine                                                                                                                                                              | CSI:FingerID | Nucleosides, nucleotides, and analogues | Purine nucleosides               |                                      | C12H16N4O6  | [M - H2O + H] <sup>+</sup> | 295.1042 | 295.1039 | -1.1895 | 19.8284 | Aerial Stem Leaf |

|    |                                                                                                     |              |                                  |                              |                                           |             |                            |          |          |         |         |                  |
|----|-----------------------------------------------------------------------------------------------------|--------------|----------------------------------|------------------------------|-------------------------------------------|-------------|----------------------------|----------|----------|---------|---------|------------------|
| 9  | phytosphingosine                                                                                    | CSI:FingerID | Organic nitrogen compounds       | Organonitrogen compounds     | Amines                                    | C18H39NO3   | [M - H2O + H] <sup>+</sup> | 300.2903 | 300.2886 | -5.6592 | 19.5812 | Aerial Stem Leaf |
| 10 | (2S)-2-hydroxy-3-(8-hydroxy-6-methoxy-1-oxoisochromen-3-yl)propanoic acid                           | CSI:FingerID | Phenylpropanoids and polyketides | Isocoumarins and derivatives |                                           | C13H12O7    | [M + Na] <sup>+</sup>      | 303.0481 | 303.0494 | 4.3461  | 14.2716 | Aerial Stem Leaf |
| 11 | N-butyl-4-(1,1,1,3,3,3-hexafluoropropyl)-6-piperazin-1-yl-1,3,5-triazin-2-amine                     | CSI:FingerID | Organoheterocyclic compounds     | Diazinanes                   | Piperazines                               | C14H20F6N6O | [M + H] <sup>+</sup>       | 403.1675 | 403.1647 | -6.9887 | 18.3736 | Aerial Stem Leaf |
| 12 | Cibotiumbaroside A                                                                                  | CSI:FingerID | Organic oxygen compounds         | Organooxygen compounds       | Carbohydrates and carbohydrate conjugates | C18H20O11   | [M + Na] <sup>+</sup>      | 435.0903 | 435.09   | -0.7117 | 13.0876 | Aerial Stem Leaf |
| 13 | Benzoic acid, 3,5-dinitro-, (1,2-dihydro-2-oxo-1-(1-piperidinylmethyl)-3H-indol-3-ylidene)hydrazide | CSI:FingerID | Organoheterocyclic compounds     | Indoles and derivatives      | N-alkylindoles                            | C21H20N6O6  | [M + H] <sup>+</sup>       | 453.1516 | 453.1555 | 8.5545  | 16.4257 | Aerial Stem Leaf |
| 14 | 2-Tetradecanoylamino-1-phosphocholine                                                               | CSI:FingerID | Organic nitrogen compounds       | Organonitrogen compounds     | Quaternary ammonium salts                 | C25H53N2O5P | [M + H] <sup>+</sup>       | 493.3764 | 493.3727 | -7.5755 | 23.5303 | Aerial Stem Leaf |
| 15 | 2-[(4-carboxylato-3,3-dimethylbutanamido)methyl]-5-[6-(pentan-3-yl)-                                | CSI:FingerID | Organoheterocyclic compounds     | Diazines                     | Pyrimidines and pyrimidine derivatives    | C29H41N5O3  | [M + H3N + H] <sup>+</sup> | 525.3553 | 525.3585 | 6.0708  | 17.515  | Aerial Stem Leaf |

|    |                                                                                                                                             |              |                               |                                  |                                           |               |                       |          |          |         |         |                  |
|----|---------------------------------------------------------------------------------------------------------------------------------------------|--------------|-------------------------------|----------------------------------|-------------------------------------------|---------------|-----------------------|----------|----------|---------|---------|------------------|
|    | 2-(pyridin-4-yl)pyrimidin-4-yl]-1-azabicyclo[2.2.2]octan-1-ium                                                                              |              |                               |                                  |                                           |               |                       |          |          |         |         |                  |
| 16 | 2-(aminomethyl)-6-[(4,6-diamino-3-[[3,5-dihydroxy-6-(hydroxymethyl)-4-(methylamino)oxan-2-yl]oxy]-2-hydroxycyclohexyl)oxy]oxane-3,4,5-triol | CSI:FingerID | Organic oxygen compounds      | Organooxygen compounds           | Carbohydrates and carbohydrate conjugates | C19H38N4O11   | [M + K] <sup>+</sup>  | 537.2174 | 537.213  | -8.259  | 19.3432 | Aerial Stem Leaf |
| 17 | Ser-Thr-Gly-Gly-Tyr-Gly                                                                                                                     | CSI:FingerID | Organic acids and derivatives | Carboxylic acids and derivatives | Amino acids, peptides, and analogues      | C22H32N6O10   | [M + Na] <sup>+</sup> | 563.2078 | 563.2088 | 1.8913  | 17.1325 | Aerial Stem Leaf |
| 18 | 2-[(1-Hydroxy-6-oxo-2-cyclohexenyl)carbonyloxymethyl]phenyl 2-O-(4-hydroxy-trans-cinnamoyl)-beta-D-glucopyranoside                          | CSI:FingerID | Organic oxygen compounds      | Organooxygen compounds           | Carbohydrates and carbohydrate conjugates | C29H30O12     | [M + Na] <sup>+</sup> | 593.1635 | 593.1663 | 4.7434  | 15.0668 | Aerial Stem Leaf |
| 19 | Fomidacillin                                                                                                                                | CSI:FingerID | Organic acids and derivatives | Carboxylic acids and derivatives | Amino acids, peptides, and analogues      | C24H28N6O10S  | [M + H] <sup>+</sup>  | 593.166  | 593.1661 | 0.1932  | 12.3653 | Aerial Stem Leaf |
| 20 | UDPglucose                                                                                                                                  | CSI:FingerID | Nucleosides, nucleotides      | Pyrimidine nucleotides           | Pyrimidine nucleotide sugars              | C15H24N2O17P2 | [M + K] <sup>+</sup>  | 605.0187 | 605.0187 | -0.1239 | 11.7225 | Aerial Stem Leaf |

|    |                                                                                                                                                                               |              |                                  |                                     |                      |              |                       |          |          |         |         |                  |
|----|-------------------------------------------------------------------------------------------------------------------------------------------------------------------------------|--------------|----------------------------------|-------------------------------------|----------------------|--------------|-----------------------|----------|----------|---------|---------|------------------|
|    |                                                                                                                                                                               |              | , and analogues                  |                                     |                      |              |                       |          |          |         |         |                  |
| 21 | N-[2-[[[3-[[1-(cyclohexylmethyl)piperidin-3-yl]methylamino]-3-oxopropyl]amino]-2-oxoethyl]-3,3,3-triphenylpropanamide                                                         | CSI:FingerID | Organic acids and derivatives    | Peptidomimetics                     | Hybrid peptides      | C39H50N4O3   | [M + H] <sup>+</sup>  | 623.3955 | 623.3994 | 6.3164  | 24.0944 | Aerial Stem Leaf |
| 22 | Sporidesmolide III                                                                                                                                                            | CSI:FingerID | Organic acids and derivatives    | Peptidomimetics                     | Depsipeptides        | C32H56N4O8   | [M + H] <sup>+</sup>  | 625.417  | 625.4146 | -3.7853 | 23.2018 | Aerial Stem Leaf |
| 23 | N-[(2R,3S)-5-[(2R)-1-hydroxypropan-2-yl]-2-[[[4-methoxyphenyl)sulfonyl-methylamino]methyl]-3-methyl-6-oxo-2,3,4,7-tetrahydro-1,5-benzoxazin-9-yl]-4-methoxybenzenesulfonamide | CSI:FingerID | Benzenoids                       | Benzene and substituted derivatives | Sulfanilides         | C31H39N3O9S2 | [M + H] <sup>+</sup>  | 662.22   | 662.2264 | 9.7619  | 14.355  | Aerial Stem Leaf |
| 24 | Cyclo(grgdspa)                                                                                                                                                                | CSI:FingerID | Organic acids and derivatives    | Peptidomimetics                     | Hybrid peptides      | C24H38N10O12 | [M + Na] <sup>+</sup> | 681.2568 | 681.2524 | -6.5781 | 15.9421 | Aerial Stem Leaf |
| 25 | [(2R,3S,4S,5R,6R)-5-acetyloxy-6-[[[(2R,3S,4S,5R,6S)-6-[2-(3,4-dihydroxyphenyl)-5,7-                                                                                           | CSI:FingerID | Phenylpropanoids and polyketides | Flavonoids                          | Flavonoid glycosides | C31H34O19    | [M + Na] <sup>+</sup> | 733.1592 | 733.1609 | 2.2612  | 15.2504 | Aerial Stem Leaf |

|    |                                                                                                                                                                                 |              |                                  |                                  |                                      |             |                       |          |          |         |         |                  |
|----|---------------------------------------------------------------------------------------------------------------------------------------------------------------------------------|--------------|----------------------------------|----------------------------------|--------------------------------------|-------------|-----------------------|----------|----------|---------|---------|------------------|
|    | dihydroxy-4-oxochromen-3-yl]oxy-3,4,5-trihydroxyoxan-2-yl]methoxy]-3,4-dihydroxyoxan-2-yl]methyl acetate                                                                        |              |                                  |                                  |                                      |             |                       |          |          |         |         |                  |
| 26 | Multiroside                                                                                                                                                                     | CSI:FingerID | Lipids and lipid-like molecules  | Prenol lipids                    | Terpene glycosides                   | C31H42O19   | [M + Na] <sup>+</sup> | 741.2218 | 741.2175 | -5.8098 | 17.3166 | Aerial Stem Leaf |
| 27 | 4-[(6-[(2-(3,4-dihydroxyphenyl)-5-hydroxy-4-oxo-7-[(3,4,5-trihydroxy-6-(hydroxymethyl)oxan-2-yl]oxy)-4H-chromen-3-yl]oxy]-3,4,5-trihydroxyoxan-2-yl)methoxy]-3-oxobutanoic acid | CSI:FingerID | Phenylpropanoids and polyketides | Flavonoids                       | Flavonoid glycosides                 | C31H34O20   | [M + Na] <sup>+</sup> | 749.1541 | 749.1561 | 2.7135  | 14.2939 | Aerial Stem Leaf |
| 28 | (3S)-4-amino-3-[[[(2S)-3-(4-hydroxyphenyl)-2-[[[(2S)-3-(1H-indol-3-yl)-2-[[[(2E)-2-[2-[(2S,3S,4S,5S,6R)-3,4,5-trihydroxy-6-(hydroxymethyl)oxan-2-yl]oxyethoxyimino]acetyl]amino | CSI:FingerID | Organic acids and derivatives    | Carboxylic acids and derivatives | Amino acids, peptides, and analogues | C34H42N6O14 | [M + H] <sup>+</sup>  | 759.2831 | 759.2845 | 1.8827  | 17.9242 | Aerial Stem Leaf |

|    |                                                                                                                                                                            |              |                                  |                                  |                                      |              |                            |          |          |         |         |                  |
|----|----------------------------------------------------------------------------------------------------------------------------------------------------------------------------|--------------|----------------------------------|----------------------------------|--------------------------------------|--------------|----------------------------|----------|----------|---------|---------|------------------|
|    | [propanoyl]amino]propanoyl]amino]-4-oxobutanoic acid                                                                                                                       |              |                                  |                                  |                                      |              |                            |          |          |         |         |                  |
| 29 | 6"-[2-(2-hydroxyethoxy)phenyl]-3",4"-diphenyl-8"-(4-pyrimidin-2-ylpiperazine-1-carbonyl)spiro[1H-indole-3,7"-4,6,8,8a-tetrahydro-3H-pyrrolo[2,1-c][1,4]oxazine]-1",2-dione | CSI:FingerID | Phenylpropanoids and polyketides | Stilbenes                        |                                      | C43H40N6O6   | [M + Na] <sup>+</sup>      | 759.2907 | 759.2842 | -8.5943 | 17.4034 | Aerial Stem Leaf |
| 30 | Bis(benzylpenicilloyl)-1,6-diaminohexane                                                                                                                                   | CSI:FingerID | Organic acids and derivatives    | Carboxylic acids and derivatives | Amino acids, peptides, and analogues | C38H48N6O6S2 | [M + Na] <sup>+</sup>      | 771.2974 | 771.2991 | 2.1248  | 17.5522 | Aerial Stem Leaf |
| 31 | 8,8'-Methylenebis[3,3',4',5,7-pentahydroxyflavan]                                                                                                                          | Dereplicator | Phenylpropanoids and polyketides | Flavonoids                       | Flavans                              | C31H28O12    | [M + H] <sup>+</sup>       | 593.1653 | 593.166  | 1.22    | 14.9915 | Aerial Stem Leaf |
| 32 | Alismol                                                                                                                                                                    | GNPS         | Lipids and lipid-like molecules  | Prenol lipids                    | Sesquiterpenoids                     | C15H24O      | [M - H2O + H] <sup>+</sup> | 203.18   | 203.1781 | -9.0821 | 23.5371 | Aerial Stem Leaf |
| 33 | Naringenin                                                                                                                                                                 | GNPS         | Phenylpropanoids and polyketides | Flavonoids                       | Flavans                              | C15H12O5     | [M + H] <sup>+</sup>       | 273.0757 | 273.0757 | 0.1238  | 15.3355 | Aerial Stem Leaf |
| 34 | Phloretin                                                                                                                                                                  | GNPS         | Phenylpropanoids and             | Linear 1,3-diarylpropanoids      | Chalcones and                        | C15H14O5     | [M + H] <sup>+</sup>       | 275.0913 | 275.0911 | -0.8254 | 14.646  | Aerial Stem Leaf |

|    |                                                                      |      |                                                |            |                         |           |                      |          |          |         |         |                        |
|----|----------------------------------------------------------------------|------|------------------------------------------------|------------|-------------------------|-----------|----------------------|----------|----------|---------|---------|------------------------|
|    |                                                                      |      | polyketide<br>s                                |            | dihydrochalc<br>ones    |           |                      |          |          |         |         |                        |
| 35 | Kaempferol                                                           | GNPS | Phenylpro<br>panoids<br>and<br>polyketide<br>s | Flavonoids | Flavones                | C15H10O6  | [M + H] <sup>+</sup> | 287.0549 | 287.0552 | 0.8116  | 12.412  | Aerial<br>Stem<br>Leaf |
| 36 | (-)-Epicatechin                                                      | GNPS | Phenylpro<br>panoids<br>and<br>polyketide<br>s | Flavonoids | Flavans                 | C15H14O6  | [M + H] <sup>+</sup> | 291.0862 | 291.0855 | -2.6032 | 5.5984  | Aerial<br>Stem<br>Leaf |
| 37 | Peonidin-3-O-<br>alpha-<br>arabinoside                               | GNPS | Phenylpro<br>panoids<br>and<br>polyketide<br>s | Flavonoids | Flavonoid<br>glycosides | C21H20O10 | [M + H] <sup>+</sup> | 433.1128 | 433.1145 | 3.7495  | 16.4505 | Aerial<br>Stem<br>Leaf |
| 38 | Quercitrin                                                           | GNPS | Phenylpro<br>panoids<br>and<br>polyketide<br>s | Flavonoids | Flavonoid<br>glycosides | C21H20O11 | [M + H] <sup>+</sup> | 449.1078 | 449.107  | -1.7037 | 13.6848 | Aerial<br>Stem<br>Leaf |
| 39 | Astragalin                                                           | GNPS | Phenylpro<br>panoids<br>and<br>polyketide<br>s | Flavonoids | Flavonoid<br>glycosides | C21H20O11 | [M + H] <sup>+</sup> | 449.1078 | 449.1067 | -2.3185 | 13.1248 | Aerial<br>Stem<br>Leaf |
| 40 | Isorhamnetin 3-<br>galactoside                                       | GNPS | Phenylpro<br>panoids<br>and<br>polyketide<br>s | Flavonoids | Flavonoid<br>glycosides | C22H22O12 | [M + H] <sup>+</sup> | 479.1183 | 479.1179 | -0.9063 | 13.8285 | Aerial<br>Stem<br>Leaf |
| 41 | Quercetin 3-<br>xylosyl-(1->2)-<br>alpha-L-<br>arabinofuranosi<br>de | GNPS | Phenylpro<br>panoids<br>and<br>polyketide<br>s | Flavonoids | Flavonoid<br>glycosides | C25H26O15 | [M + H] <sup>+</sup> | 567.1344 | 567.1346 | 0.4681  | 12.3405 | Aerial<br>Stem<br>Leaf |



|    |                                                                                                                                                                          |      |                                  |            |                      |                                                 |                      |          |          |         |         |                  |
|----|--------------------------------------------------------------------------------------------------------------------------------------------------------------------------|------|----------------------------------|------------|----------------------|-------------------------------------------------|----------------------|----------|----------|---------|---------|------------------|
| 42 | Leucoside                                                                                                                                                                | GNPS | Phenylpropanoids and polyketides | Flavonoids | Flavonoid glycosides | C <sub>26</sub> H <sub>28</sub> O <sub>15</sub> | [M + H] <sup>+</sup> | 581.15   | 581.1512 | 1.9924  | 12.412  | Aerial Stem Leaf |
| 43 | Peltatoside                                                                                                                                                              | GNPS | Phenylpropanoids and polyketides | Flavonoids | Flavonoid glycosides | C <sub>26</sub> H <sub>28</sub> O <sub>16</sub> | [M + H] <sup>+</sup> | 597.1449 | 597.1448 | -0.2062 | 11.4279 | Aerial Stem Leaf |
| 44 | 3-[(2S,3R,4S,5S,6R)-4,5-dihydroxy-6-(hydroxymethyl)-3-[(2S,3R,4S,5R)-3,4,5-trihydroxyoxan-2-yl]oxyoxan-2-yl]oxy-2-(3,4-dihydroxyphenyl)-5-hydroxy-7-methoxychromen-4-one | GNPS | Phenylpropanoids and polyketides | Flavonoids | Flavonoid glycosides | C <sub>27</sub> H <sub>30</sub> O <sub>16</sub> | [M + H] <sup>+</sup> | 611.1606 | 611.1601 | -0.8647 | 12.8588 | Aerial Stem Leaf |
| 45 | 3-{6-[[[(6S,2R,3R,4R,5R)-3,4,5-trihydroxy-6-methyl(2H-3,4,5,6-tetrahydropyran-2-yl)oxy]]methyl](2S,4S,5S,3R,6R)-3,4,5-trihydroxy(2H-3,4,5,6-                             | GNPS | Phenylpropanoids and polyketides | Flavonoids | Flavonoid glycosides | C <sub>27</sub> H <sub>30</sub> O <sub>16</sub> | [M + H] <sup>+</sup> | 611.1606 | 611.1596 | -1.6544 | 12.2554 | Aerial Stem Leaf |

|    |                                                                                                                                         |               |                                           |                   |                                 |           |                      |          |         |         |         |                  |
|----|-----------------------------------------------------------------------------------------------------------------------------------------|---------------|-------------------------------------------|-------------------|---------------------------------|-----------|----------------------|----------|---------|---------|---------|------------------|
|    | tetrahydropyran-2-yl-oxy))-2-(2,3-dihydroxyphenyl)-5,7-dihydroxychromen-4-one                                                           |               |                                           |                   |                                 |           |                      |          |         |         |         |                  |
| 46 | Epigallocatechin-3-O-p-hydroxybenzoate-(4b-8)-epigallocatechin                                                                          | MolDiscover y | Phenylpropanoids and polyketides          | Flavonoids        | Biflavonoids and polyflavonoids | C37H30O16 | [M + H] <sup>+</sup> | 731.1606 | 731.16  | -0.7999 | 13.4892 | Aerial Stem Leaf |
| 47 | Quercetin-3-(2''-galloylglucosyl)-(1-2)-alpha-L-arabinofuranoside                                                                       | MolDiscover y | Phenylpropanoids and polyketides          | Flavonoids        | Flavonoid glycosides            | C33H32O20 | [M + H] <sup>+</sup> | 749.1559 | 749.156 | 0.1423  | 14.227  | Aerial Stem Leaf |
| 48 | 3,3',4,4',5,5',9-Heptahydroxy-7,9'-epoxylignan-3,3',5,5'-tetramethyl ether, 9-O-[4-hydroxy-3-methoxy-E-cinnamoyl-(6)-D-glucopyranoside] | MolDiscover y | Lignans, neolignans and related compounds | Lignan glycosides |                                 | C38H46O16 | [M + H] <sup>+</sup> | 759.2858 | 759.286 | 0.2826  | 16.6707 | Aerial Stem Leaf |
| 49 | Acanthoside D                                                                                                                           | MolDiscover y | Lignans, neolignans and related compounds | Lignan glycosides |                                 | C36H50O18 | [M + H] <sup>+</sup> | 771.3069 | 771.3   | -8.9651 | 17.8657 | Aerial Stem Leaf |
| 50 | Dolabripuroanthocyanidin                                                                                                                | MolDiscover y | Phenylpropanoids and                      | Flavonoids        | Biflavonoids and polyflavonoids | C45H38O18 | [M + H] <sup>+</sup> | 867.213  | 867.21  | -3.4759 | 10.5491 | Aerial Stem Leaf |

|    |                                                                                                                                                                                           |                  |                                                |                      |                                           |           |                      |           |         |         |         |                        |
|----|-------------------------------------------------------------------------------------------------------------------------------------------------------------------------------------------|------------------|------------------------------------------------|----------------------|-------------------------------------------|-----------|----------------------|-----------|---------|---------|---------|------------------------|
|    |                                                                                                                                                                                           |                  | polyketide<br>s                                |                      |                                           |           |                      |           |         |         |         |                        |
| 51 | Octa-acetyl-<br>listvenol                                                                                                                                                                 | MolDiscover<br>y | Phenylpro<br>panoids<br>and<br>polyketide<br>s | Diarylheptan<br>oids | Linear<br>diarylheptan<br>oids            | C46H40O18 | [M + H] <sup>+</sup> | 881.2287  | 881.227 | -1.8888 | 13.8829 | Aerial<br>Stem<br>Leaf |
| 52 | Epigallocatechin<br>-3-O-p-<br>hydroxybenzoat<br>e-(4b-8)-<br>epigallocatechin<br>-3-O-gallate                                                                                            | MolDiscover<br>y | Phenylpro<br>panoids<br>and<br>polyketide<br>s | Flavonoids           | Biflavonoids<br>and<br>polyflavonoi<br>ds | C44H34O20 | [M + H] <sup>+</sup> | 883.1715  | 883.174 | 2.7815  | 15.4014 | Aerial<br>Stem<br>Leaf |
| 53 | Epicatechin-(4b-<br>8)-epicatechin,<br>3-O-gallate-(4b-<br>8)-catechin                                                                                                                    | MolDiscover<br>y | Phenylpro<br>panoids<br>and<br>polyketide<br>s | Flavonoids           | Biflavonoids<br>and<br>polyflavonoi<br>ds | C52H42O22 | [M + H] <sup>+</sup> | 1019.224  | 1019.22 | -3.8981 | 12.3919 | Aerial<br>Stem<br>Leaf |
| 54 | Camelliatannin<br>B                                                                                                                                                                       | MolDiscover<br>y | Phenylpro<br>panoids<br>and<br>polyketide<br>s | Tannins              | Complex<br>tannins                        | C49H36O27 | [M + H] <sup>+</sup> | 1057.1516 | 1057.15 | -1.5096 | 12.5426 | Aerial<br>Stem<br>Leaf |
| 55 | 3,3',4',5,7-<br>Pentahydroxyfla<br>van-(4-8)-<br>3,3',4',5,7-<br>pentahydroxyfla<br>van-(4-6)-<br>3,3',4',5,7-<br>pentahydroxyfla<br>van-(4-8)-<br>3,3',4',5,7-<br>pentahydroxyfla<br>van | MolDiscover<br>y | Phenylpro<br>panoids<br>and<br>polyketide<br>s | Flavonoids           | Biflavonoids<br>and<br>polyflavonoi<br>ds | C60H50O24 | [M + H] <sup>+</sup> | 1155.2764 | 1155.27 | -5.542  | 11.4495 | Aerial<br>Stem<br>Leaf |
| 56 | Procyanidin C1<br>3',3''-di-O-<br>gallate                                                                                                                                                 | MolDiscover<br>y | Phenylpro<br>panoids<br>and                    | Flavonoids           | Biflavonoids<br>and                       | C59H46O26 | [M + H] <sup>+</sup> | 1171.2349 | 1171.23 | -4.2106 | 13.3533 | Aerial<br>Stem<br>Leaf |

|    |                                                                                                                                                           |              |                                                       |                                        |                                                    |             |                            |          |          |         |         |              |
|----|-----------------------------------------------------------------------------------------------------------------------------------------------------------|--------------|-------------------------------------------------------|----------------------------------------|----------------------------------------------------|-------------|----------------------------|----------|----------|---------|---------|--------------|
|    |                                                                                                                                                           |              | polyketide<br>s                                       |                                        | polyflavonoi<br>ds                                 |             |                            |          |          |         |         |              |
| 57 | Lopac-P-101                                                                                                                                               | CSI:FingerID | Nucleoside<br>s,<br>nucleotides<br>, and<br>analogues | Purine<br>nucleosides                  |                                                    | C16H18N6O4  | [M + H] <sup>+</sup>       | 359.1462 | 359.1486 | 6.8352  | 23.8542 | Leaf         |
| 58 | 6-[(4,6-diamino-3-[[3-amino-6-(aminomethyl)-4,5-dihydroxyoxan-2-yl]oxy}-2-hydroxycyclohexyl)oxy]-2-(hydroxymethyl)-3-methyl-4-(methylamino)oxane-3,5-diol | CSI:FingerID | Organic<br>oxygen<br>compound<br>s                    | Organooxygen<br>compounds              | Carbohydrates<br>and<br>carbohydrate<br>conjugates | C20H41N5O10 | [M + Na] <sup>+</sup>      | 534.2751 | 534.2732 | -3.4898 | 21.4507 | Leaf         |
| 59 | Luminmycin B                                                                                                                                              | CSI:FingerID | Organic<br>acids and<br>derivatives                   | Carboxylic<br>acids and<br>derivatives | Amino acids,<br>peptides,<br>and<br>analogues      | C27H48N4O7  | [M - H2O + H] <sup>+</sup> | 523.3496 | 523.346  | -6.7819 | 18.2089 | Stem<br>Leaf |
