# Supplementary material for: Metabolomic Characterization of Phoradendron brachystachyum Mistletoe and In-Silico and In-Vitro Investigation of Its Therapeutic Potential in Metabolic Disorders
Source: Plants (Basel). 2023 Jul 22;12(14):2729. doi: 10.3390/plants12142729 (PMC10383180; doi:10.3390/plants12142729)
Supplement: Supplementary file 1 [file plants-12-02729-s001.zip › SwissTargetPrediction Final.xlsx]

## Sheet: Naringenin
Naringenin
Target	Common name	Uniprot ID	ChEMBL ID	Target Class	Probability*	Known actives (3D/2D)
Cytochrome P450 19A1	CYP19A1	P11511	CHEMBL1978	Cytochrome P450	0.912946	20 / 52
Carbonic anhydrase VII	CA7	P43166	CHEMBL2326	Lyase	0.912946	15 / 7
Multidrug resistance-associated protein 1	ABCC1	P33527	CHEMBL3004	Primary active transporter	0.912946	2 / 2
Estradiol 17-beta-dehydrogenase 1	HSD17B1	P14061	CHEMBL3181	Enzyme	0.912946	109 / 1
Carbonic anhydrase XII	CA12	O43570	CHEMBL3242	Lyase	0.912946	36 / 6
Testis-specific androgen-binding protein	SHBG	P04278	CHEMBL3305	Secreted protein	0.912946	2 / 2
Carbonic anhydrase IV	CA4	P22748	CHEMBL3729	Lyase	0.912946	10 / 7
Cytochrome P450 1B1	CYP1B1	Q16678	CHEMBL4878	Cytochrome P450	0.912946	7 / 6
Carbonyl reductase [NADPH] 1	CBR1	P16152	CHEMBL5586	Enzyme	0.912946	1 / 1
Estrogen receptor alpha	ESR1	P03372	CHEMBL206	Nuclear receptor	0.583886	258 / 86
Estrogen receptor beta	ESR2	Q92731	CHEMBL242	Nuclear receptor	0.583886	250 / 78
Cyclooxygenase-1	PTGS1	P23219	CHEMBL221	Oxidoreductase	0.428281	10 / 13
Monoamine oxidase B	MAOB	P27338	CHEMBL2039	Oxidoreductase	0.362675	13 / 129
Adenosine A1 receptor	ADORA1	P30542	CHEMBL226	Family A G protein-coupled receptor	0.166097	8 / 3
Adenosine A3 receptor	ADORA3	P0DMS8	CHEMBL256	Family A G protein-coupled receptor	0.141522	3 / 2
ATP-binding cassette sub-family G member 2	ABCG2	Q9UNQ0	CHEMBL5393	Primary active transporter	0.125143	2 / 7
Taste receptor type 2 member 31	TAS2R31	P59538	CHEMBL2034804	Taste family G protein-coupled receptor	0.125143	1 / 3
Aldo-keto-reductase family 1 member C3	AKR1C3	P42330	CHEMBL4681	Enzyme	0.125143	0 / 7
Phospholipase A2 group 1B	PLA2G1B	P04054	CHEMBL4426	Enzyme	0.116965	0 / 1
Metabotropic glutamate receptor 5	GRM5	P41594	CHEMBL3227	Family C G protein-coupled receptor	0.116965	0 / 10
Acyl coenzyme A:cholesterol acyltransferase	CES1	P23141	CHEMBL2265	Enzyme	0.108771	0 / 1
Peroxisome proliferator-activated receptor gamma	PPARG	P37231	CHEMBL235	Nuclear receptor	0.108771	0 / 131
Carboxylesterase 2	CES2	O00748	CHEMBL3180	Enzyme	0.108771	0 / 1
Sodium/glucose cotransporter 2	SLC5A2	P31639	CHEMBL3884	Electrochemical transporter	0.100579	0 / 6
Matrix metalloproteinase 12	MMP12	P39900	CHEMBL4393	Protease	0.100579	10 / 3
DNA polymerase beta (by homology)	POLB	P06746	CHEMBL2392	Enzyme	0.100579	0 / 2
Matrix metalloproteinase 13	MMP13	P45452	CHEMBL280	Protease	0.100579	24 / 2
Phospholipase A2 group IIA	PLA2G2A	P14555	CHEMBL3474	Enzyme	0.100579	0 / 8
Phospholipase A2 group V	PLA2G5	P39877	CHEMBL4323	Enzyme	0.100579	0 / 3
Group X secretory phospholipase A2	PLA2G10	O15496	CHEMBL4342	Enzyme	0.100579	0 / 1
Beta-secretase 1	BACE1	P56817	CHEMBL4822	Protease	0.100579	22 / 14
Neuronal acetylcholine receptor protein alpha-7 subunit	CHRNA7	P36544	CHEMBL2492	Ligand-gated ion channel	0.100579	8 / 0
Kallikrein 1	KLK1	P06870	CHEMBL2319	Protease	0.100579	0 / 1
Kallikrein 2	KLK2	P20151	CHEMBL2442	Protease	0.100579	0 / 1
Retinoid X receptor alpha	RXRA	P19793	CHEMBL2061	Nuclear receptor	0.100579	0 / 16
Plasminogen activator inhibitor-1	SERPINE1	P05121	CHEMBL3475	Secreted protein	0.100579	9 / 3
Tyrosine-protein kinase SRC	SRC	P12931	CHEMBL267	Kinase	0.100579	35 / 3
Carbonic anhydrase II	CA2	P00918	CHEMBL205	Lyase	0.100579	69 / 4
Carbonic anhydrase I	CA1	P00915	CHEMBL261	Lyase	0.100579	60 / 3
17-beta-hydroxysteroid dehydrogenase 14	HSD17B14	Q9BPX1	CHEMBL3712868	Enzyme	0.100579	1 / 0
Stem cell growth factor receptor	KIT	P10721	CHEMBL1936	Kinase	0.100579	2 / 3
Vascular endothelial growth factor receptor 2	KDR	P35968	CHEMBL279	Kinase	0.100579	9 / 9
Fibroblast growth factor receptor 1	FGFR1	P11362	CHEMBL3650	Kinase	0.100579	3 / 3
Hepatocyte growth factor receptor	MET	P08581	CHEMBL3717	Kinase	0.100579	21 / 4
Carbonic anhydrase III	CA3	P07451	CHEMBL2885	Lyase	0.100579	2 / 3
Carbonic anhydrase VI	CA6	P23280	CHEMBL3025	Lyase	0.100579	4 / 2
Carbonic anhydrase XIII	CA13	Q8N1Q1	CHEMBL3912	Lyase	0.100579	3 / 3
Carbonic anhydrase VB	CA5B	Q9Y2D0	CHEMBL3969	Lyase	0.100579	4 / 2
Carbonic anhydrase VA	CA5A	P35218	CHEMBL4789	Lyase	0.100579	5 / 3
Quinone reductase 2	NQO2	P16083	CHEMBL3959	Enzyme	0.100579	6 / 0
Cathepsin (B and K)	CTSB	P07858	CHEMBL4072	Protease	0.100579	0 / 1
NADPH oxidase 4	NOX4	Q9NPH5	CHEMBL1250375	Enzyme	0.100579	9 / 0
Aldose reductase	AKR1B1	P15121	CHEMBL1900	Enzyme	0.100579	34 / 47
Dual specificty protein kinase CLK1	CLK1	P49759	CHEMBL4224	Kinase	0.100579	20 / 0
Dual specificity tyrosine-phosphorylation-regulated kinase 1B	DYRK1B	Q9Y463	CHEMBL5543	Kinase	0.100579	18 / 0
Butyrylcholinesterase	BCHE	P06276	CHEMBL1914	Hydrolase	0.100579	3 / 3
Carbonic anhydrase IX	CA9	Q16790	CHEMBL3594	Lyase	0.100579	43 / 1
Estrogen-related receptor alpha	ESRRA	P11474	CHEMBL3429	Nuclear receptor	0.100579	17 / 0
Estrogen-related receptor beta	ESRRB	O95718	CHEMBL3751	Nuclear receptor	0.100579	17 / 0
Cyclin-dependent kinase 5/CDK5 activator 1	CDK5R1 CDK5	Q15078 Q00535	CHEMBL1907600	Kinase	0.100579	12 / 0
Insulin-like growth factor I receptor	IGF1R	P08069	CHEMBL1957	Kinase	0.100579	18 / 0
Insulin receptor	INSR	P06213	CHEMBL1981	Kinase	0.100579	5 / 0
Dual-specificity tyrosine-phosphorylation regulated kinase 1A	DYRK1A	Q13627	CHEMBL2292	Kinase	0.100579	35 / 1
Estradiol 17-beta-dehydrogenase 2	HSD17B2	P37059	CHEMBL2789	Enzyme	0.100579	106 / 0
Insulin-like growth factor binding protein 3	IGFBP3	P17936	CHEMBL3997	Secreted protein	0.100579	1 / 0
Matrix metalloproteinase 2	MMP2	P08253	CHEMBL333	Protease	0.100579	75 / 7
14-3-3 protein gamma	YWHAG	P61981	CHEMBL1293296	Unclassified protein	0.100579	1 / 0
NAD-dependent deacetylase sirtuin 2	SIRT2	Q8IXJ6	CHEMBL4462	Eraser	0.100579	0 / 27
Coagulation factor VII/tissue factor	F3	P13726	CHEMBL4081	Surface antigen	0.100579	8 / 0
Prostanoid EP1 receptor	PTGER1	P34995	CHEMBL1811	Family A G protein-coupled receptor	0.100579	0 / 15
Prostanoid EP2 receptor	PTGER2	P43116	CHEMBL1881	Family A G protein-coupled receptor	0.100579	0 / 16
Prostanoid EP3 receptor	PTGER3	P43115	CHEMBL3710	Family A G protein-coupled receptor	0.100579	0 / 12
Apoptosis regulator Bcl-X	BCL2L1	Q07817	CHEMBL4625	Other ion channel	0.100579	1 / 0
PI3-kinase p110-beta subunit	PIK3CB	P42338	CHEMBL3145	Enzyme	0.100579	3 / 0
Cytochrome P450 2C9	CYP2C9	P11712	CHEMBL3397	Cytochrome P450	0.100579	2 / 0
Cytochrome P450 3A4	CYP3A4	P08684	CHEMBL340	Cytochrome P450	0.100579	2 / 0
PI3-kinase p110-alpha subunit	PIK3CA	P42336	CHEMBL4005	Enzyme	0.100579	16 / 0
Transitional endoplasmic reticulum ATPase	VCP	P55072	CHEMBL1075145	Primary active transporter	0.100579	4 / 0
Placenta growth factor	PGF	P49763	CHEMBL1697671	Unclassified protein	0.100579	0 / 3
Vascular endothelial growth factor A	VEGFA	P15692	CHEMBL1783	Secreted protein	0.100579	0 / 3
Endothelin receptor ET-A	EDNRA	P25101	CHEMBL252	Family A G protein-coupled receptor	0.100579	3 / 28
Serine/threonine-protein kinase/endoribonuclease IRE1	ERN1	O75460	CHEMBL1163101	Enzyme	0.100579	21 / 0
Matrix metalloproteinase 3	MMP3	P08254	CHEMBL283	Protease	0.100579	24 / 0
Beta amyloid A4 protein	APP	P05067	CHEMBL2487	Membrane receptor	0.100579	13 / 2
Glycogen synthase kinase-3 beta	GSK3B	P49841	CHEMBL262	Kinase	0.100579	18 / 0
Apoptosis regulator Bcl-2	BCL2	P10415	CHEMBL4860	Other ion channel	0.100579	7 / 8
Matrix metalloproteinase 9	MMP9	P14780	CHEMBL321	Protease	0.100579	78 / 2
Serine/threonine-protein kinase WEE1	WEE1	P30291	CHEMBL5491	Kinase	0.100579	59 / 0
Tyrosine-protein kinase LCK	LCK	P06239	CHEMBL258	Kinase	0.100579	16 / 0
Tyrosine-protein kinase SYK	SYK	P43405	CHEMBL2599	Kinase	0.100579	8 / 0
Cyclin-dependent kinase 2/cyclin E1	CCNE1 CDK2	P24864 P24941	CHEMBL1907605	Kinase	0.100579	2 / 0
CDK3/Cyclin E	CCNE1 CDK3	P24864 Q00526	CHEMBL3038471	Kinase	0.100579	2 / 0
Cyclin-dependent kinase 4	CDK4	P11802	CHEMBL331	Kinase	0.100579	6 / 0
Serine/threonine-protein kinase Aurora-A	AURKA	O14965	CHEMBL4722	Kinase	0.100579	20 / 0
Alpha-synuclein	SNCA	P37840	CHEMBL6152	Unclassified protein	0.100579	11 / 0
Arachidonate 12-lipoxygenase	ALOX12	P18054	CHEMBL3687	Enzyme	0.100579	8 / 4
Hepatocyte nuclear factor 4-alpha	HNF4A	P41235	CHEMBL5398	Unclassified protein	0.100579	0 / 5
Cyclin-dependent kinase 1/cyclin B1	CDK1 CCNB1	P06493 P14635	CHEMBL1907602	Other cytosolic protein	0	1 / 0
G-protein coupled receptor kinase 2	GRK2	P25098	CHEMBL4079	Kinase	0	2 / 0
Dual specificity protein phosphatase 3	DUSP3	P51452	CHEMBL2635	Phosphatase	0	1 / 0

## Sheet: Phloretin
Phloretin
Target	Common name	Uniprot ID	ChEMBL ID	Target Class	Probability*	Known actives (3D/2D)
Estrogen receptor alpha	ESR1	P03372	CHEMBL206	Nuclear receptor	0.912946	335 / 65
Estrogen receptor beta	ESR2	Q92731	CHEMBL242	Nuclear receptor	0.116965	323 / 63
Arachidonate 5-lipoxygenase	ALOX5	P09917	CHEMBL215	Oxidoreductase	0.108771	66 / 37
Acetylcholinesterase	ACHE	P22303	CHEMBL220	Hydrolase	0.100579	9 / 44
Tyrosinase	TYR	P14679	CHEMBL1973	Oxidoreductase	0.100579	5 / 6
Phospholipase A2 group V	PLA2G5	P39877	CHEMBL4323	Enzyme	0.100579	0 / 3
NADPH oxidase 4	NOX4	Q9NPH5	CHEMBL1250375	Enzyme	0.100579	10 / 0
Estradiol 17-beta-dehydrogenase 2	HSD17B2	P37059	CHEMBL2789	Enzyme	0.100579	115 / 0
Estradiol 17-beta-dehydrogenase 3	HSD17B3	P37058	CHEMBL4234	Enzyme	0.100579	13 / 6
Testis-specific androgen-binding protein	SHBG	P04278	CHEMBL3305	Secreted protein	0.100579	3 / 11
17-beta-hydroxysteroid dehydrogenase 14	HSD17B14	Q9BPX1	CHEMBL3712868	Enzyme	0.100579	1 / 0
Cyclin-dependent kinase 4	CDK4	P11802	CHEMBL331	Kinase	0.100579	25 / 0
Phospholipase A2 group IIA	PLA2G2A	P14555	CHEMBL3474	Enzyme	0.100579	1 / 7
14-3-3 protein gamma	YWHAG	P61981	CHEMBL1293296	Unclassified protein	0.100579	2 / 0
Carbonic anhydrase VI	CA6	P23280	CHEMBL3025	Lyase	0.100579	11 / 0
Carbonic anhydrase VB	CA5B	Q9Y2D0	CHEMBL3969	Lyase	0.100579	10 / 0
Carbonic anhydrase VA	CA5A	P35218	CHEMBL4789	Lyase	0.100579	15 / 0
Alpha-synuclein	SNCA	P37840	CHEMBL6152	Unclassified protein	0.100579	24 / 0
Telomerase reverse transcriptase	TERT	O14746	CHEMBL2916	Enzyme	0.100579	12 / 0
Serine/threonine-protein kinase WEE1	WEE1	P30291	CHEMBL5491	Kinase	0.100579	79 / 0
Quinone reductase 2	NQO2	P16083	CHEMBL3959	Enzyme	0.100579	6 / 0
MAP kinase p38 alpha	MAPK14	Q16539	CHEMBL260	Kinase	0.100579	12 / 0
6-phosphogluconate dehydrogenase	PGD	P52209	CHEMBL3404	Enzyme	0.100579	4 / 0
Heat shock protein HSP 90-alpha	HSP90AA1	P07900	CHEMBL3880	Other cytosolic protein	0.100579	38 / 0
Insulin receptor	INSR	P06213	CHEMBL1981	Kinase	0.100579	7 / 0
Cyclin-dependent kinase 5/CDK5 activator 1	CDK5R1 CDK5	Q15078 Q00535	CHEMBL1907600	Kinase	0.100579	23 / 0
Secreted frizzled-related protein 1	SFRP1	Q8N474	CHEMBL5517	Unclassified protein	0.100579	1 / 0
Beta amyloid A4 protein	APP	P05067	CHEMBL2487	Membrane receptor	0.100579	16 / 0
Cyclooxygenase-2	PTGS2	P35354	CHEMBL230	Oxidoreductase	0.100579	54 / 16
Insulin-like growth factor binding protein 3	IGFBP3	P17936	CHEMBL3997	Secreted protein	0.100579	1 / 0
Cyclin-dependent kinase 1	CDK1	P06493	CHEMBL308	Kinase	0.100579	28 / 1
Estradiol 17-beta-dehydrogenase 1	HSD17B1	P14061	CHEMBL3181	Enzyme	0.100579	120 / 25
Histone deacetylase 3	HDAC3	O15379	CHEMBL1829	Eraser	0.100579	109 / 0
Histone deacetylase 6	HDAC6	Q9UBN7	CHEMBL1865	Eraser	0.100579	188 / 0
C-C chemokine receptor type 5	CCR5	P51681	CHEMBL274	Family A G protein-coupled receptor	0.100579	26 / 0
Cyclin-dependent kinase 2	CDK2	P24941	CHEMBL301	Kinase	0.100579	56 / 0
Cyclooxygenase-1	PTGS1	P23219	CHEMBL221	Oxidoreductase	0.100579	22 / 12
Interferon-induced, double-stranded RNA-activated protein kinase	EIF2AK2	P19525	CHEMBL5785	Kinase	0.100579	3 / 0
Receptor protein-tyrosine kinase erbB-2	ERBB2	P04626	CHEMBL1824	Kinase	0.100579	18 / 0
Tissue-type plasminogen activator	PLAT	P00750	CHEMBL1873	Protease	0.100579	17 / 0
Cyclin-dependent kinase 2/cyclin E	CCNE2 CDK2 CCNE1	O96020 P24941 P24864	CHEMBL2094126	Other cytosolic protein	0.100579	10 / 0
Urokinase-type plasminogen activator	PLAU	P00749	CHEMBL3286	Protease	0.100579	59 / 0
Monoamine oxidase A	MAOA	P21397	CHEMBL1951	Oxidoreductase	0.100579	26 / 6
Serine/threonine-protein kinase Chk1	CHEK1	O14757	CHEMBL4630	Kinase	0.100579	87 / 0
Pyruvate dehydrogenase kinase isoform 1	PDK1	Q15118	CHEMBL4766	Kinase	0.100579	133 / 0
Monoamine oxidase B	MAOB	P27338	CHEMBL2039	Oxidoreductase	0.100579	34 / 59
DNA topoisomerase I	TOP1	P11387	CHEMBL1781	Isomerase	0	7 / 0
Tyrosine-protein kinase ABL	ABL1	P00519	CHEMBL1862	Kinase	0	31 / 0
Platelet-derived growth factor receptor beta	PDGFRB	P09619	CHEMBL1913	Kinase	0	5 / 0
Tyrosine-protein kinase receptor FLT3	FLT3	P36888	CHEMBL1974	Kinase	0	22 / 0
Glucagon receptor	GCGR	P47871	CHEMBL1985	Family B G protein-coupled receptor	0	9 / 0
Tyrosine-protein kinase SYK	SYK	P43405	CHEMBL2599	Kinase	0	30 / 0
Zinc finger protein GLI2	GLI2	P10070	CHEMBL5119	Transcription factor	0	1 / 0
Zinc finger protein GLI1	GLI1	P08151	CHEMBL5461	Transcription factor	0	1 / 0
Cytochrome P450 19A1	CYP19A1	P11511	CHEMBL1978	Cytochrome P450	0	37 / 57
Hematopoietic prostaglandin D synthase	HPGDS	O60760	CHEMBL5879	Transferase	0	2 / 0
Rho-associated protein kinase 1	ROCK1	Q13464	CHEMBL3231	Kinase	0	9 / 0
ADAM17	ADAM17	P78536	CHEMBL3706	Protease	0	165 / 0
Dopamine D1 receptor	DRD1	P21728	CHEMBL2056	Family A G protein-coupled receptor	0	42 / 0
Serine/threonine-protein kinase B-raf	BRAF	P15056	CHEMBL5145	Kinase	0	84 / 0
Palmitoleoyl-protein carboxylesterase NOTUM	NOTUM	Q6P988	CHEMBL3714531	Hydrolase	0	1 / 0
Coagulation factor VII/tissue factor	F3	P13726	CHEMBL4081	Surface antigen	0	9 / 0
Phosphodiesterase 5A	PDE5A	O76074	CHEMBL1827	Phosphodiesterase	0	30 / 0
Beta-glucuronidase	GUSB	P08236	CHEMBL2728	Enzyme	0	9 / 0
PI3-kinase p110-gamma subunit	PIK3CG	P48736	CHEMBL3267	Enzyme	0	60 / 0
Serine/threonine-protein kinase Aurora-A	AURKA	O14965	CHEMBL4722	Kinase	0	51 / 0
MAP kinase signal-integrating kinase 2	MKNK2	Q9HBH9	CHEMBL4204	Kinase	0	8 / 0
Dynamin-1	DNM1	Q05193	CHEMBL4958	Enzyme	0	4 / 0
Matrix metalloproteinase 7	MMP7	P09237	CHEMBL4073	Protease	0	58 / 0
Matrix metalloproteinase 8	MMP8	P22894	CHEMBL4588	Protease	0	138 / 0
Serine/threonine-protein kinase Sgk1	SGK1	O00141	CHEMBL2343	Kinase	0	2 / 0
Matrix metalloproteinase 3	MMP3	P08254	CHEMBL283	Protease	0	181 / 0
Histone deacetylase 3/Nuclear receptor corepressor 2 (HDAC3/NCoR2)	NCOR2 HDAC3	Q9Y618 O15379	CHEMBL2111363	Eraser	0	6 / 0
Cyclin-dependent kinase 2/cyclin E1	CCNE1 CDK2	P24864 P24941	CHEMBL1907605	Kinase	0	9 / 0
CDK3/Cyclin E	CCNE1 CDK3	P24864 Q00526	CHEMBL3038471	Kinase	0	4 / 0
Aldo-keto reductase family 1 member B10	AKR1B10	O60218	CHEMBL5983	Enzyme	0	8 / 0
Uridine phosphorylase 1 (by homology)	UPP1	Q16831	CHEMBL4811	Enzyme	0	9 / 0
Matrix metalloproteinase 16	MMP16	P51512	CHEMBL2200	Protease	0	12 / 0
Matrix metalloproteinase 15	MMP15	P51511	CHEMBL2963	Protease	0	8 / 0
Matrix metalloproteinase 14	MMP14	P50281	CHEMBL3869	Protease	0	41 / 0
Ribosomal protein S6 kinase alpha 5	RPS6KA5	O75582	CHEMBL4237	Kinase	0	2 / 0
Matrix metalloproteinase 26	MMP26	Q9NRE1	CHEMBL4707	Protease	0	7 / 0
Cyclin-dependent kinase 1/cyclin B1	CDK1 CCNB1	P06493 P14635	CHEMBL1907602	Other cytosolic protein	0	10 / 0
DNA (cytosine-5)-methyltransferase 1	DNMT1	P26358	CHEMBL1993	Writer	0	1 / 0
G-protein coupled receptor kinase 2	GRK2	P25098	CHEMBL4079	Kinase	0	5 / 0
Signal transducer and activator of transcription 1-alpha/beta	STAT1	P42224	CHEMBL6101	Transcription factor	0	1 / 0
Squalene monooxygenase (by homology)	SQLE	Q14534	CHEMBL3592	Enzyme	0	2 / 0
Transient receptor potential cation channel subfamily M member 8 (by homology)	TRPM8	Q7Z2W7	CHEMBL1075319	Voltage-gated ion channel	0	6 / 0
Histone deacetylase 5	HDAC5	Q9UQL6	CHEMBL2563	Eraser	0	15 / 0
Histone deacetylase 7	HDAC7	Q8WUI4	CHEMBL2716	Eraser	0	15 / 0
Histone deacetylase 9	HDAC9	Q9UKV0	CHEMBL4145	Eraser	0	12 / 0
Alkaline phosphatase, tissue-nonspecific isozyme	ALPL	P05186	CHEMBL5979	Enzyme	0	15 / 0
Serine/threonine-protein kinase RAF	RAF1	P04049	CHEMBL1906	Kinase	0	55 / 0
Serine/threonine-protein kinase Aurora-B	AURKB	Q96GD4	CHEMBL2185	Kinase	0	20 / 0
Dual specificity protein phosphatase 3	DUSP3	P51452	CHEMBL2635	Phosphatase	0	3 / 0
Poly [ADP-ribose] polymerase-1	PARP1	P09874	CHEMBL3105	Enzyme	0	33 / 0
Adenylate cyclase type V	ADCY5	O95622	CHEMBL3189	Enzyme	0	10 / 0
Tankyrase-2	TNKS2	Q9H2K2	CHEMBL6154	Enzyme	0	5 / 0
Tankyrase-1	TNKS	O95271	CHEMBL6164	Enzyme	0	5 / 0
Kinesin-1 heavy chain/ Tyrosine-protein kinase receptor RET	RET	P07949	CHEMBL2041	Kinase	0	36 / 0

## Sheet: Sakuranetin
Sakuranetin
Target	Common name	Uniprot ID	ChEMBL ID	Target Class	Probability*	Known actives (3D/2D)
Taste receptor type 2 member 31	TAS2R31	P59538	CHEMBL2034804	Taste family G protein-coupled receptor	1	3 / 3
Adenosine A1 receptor (by homology)	ADORA1	P30542	CHEMBL226	Family A G protein-coupled receptor	1	41 / 3
Adenosine A3 receptor	ADORA3	P0DMS8	CHEMBL256	Family A G protein-coupled receptor	1	13 / 2
Estrogen receptor beta	ESR2	Q92731	CHEMBL242	Nuclear receptor	0.418947	122 / 77
Estradiol 17-beta-dehydrogenase 1	HSD17B1	P14061	CHEMBL3181	Enzyme	0.394383	71 / 1
Monoamine oxidase B	MAOB	P27338	CHEMBL2039	Oxidoreductase	0.328396	41 / 129
Estrogen receptor alpha	ESR1	P03372	CHEMBL206	Nuclear receptor	0.312022	124 / 85
ATP-binding cassette sub-family G member 2	ABCG2	Q9UNQ0	CHEMBL5393	Primary active transporter	0.303816	20 / 7
Cytochrome P450 1B1	CYP1B1	Q16678	CHEMBL4878	Cytochrome P450	0.279037	6 / 6
Cytochrome P450 19A1	CYP19A1	P11511	CHEMBL1978	Cytochrome P450	0.262582	24 / 52
Carbonic anhydrase VII	CA7	P43166	CHEMBL2326	Lyase	0.237885	12 / 7
Carbonic anhydrase XII	CA12	O43570	CHEMBL3242	Lyase	0.237885	53 / 6
Carbonic anhydrase IV	CA4	P22748	CHEMBL3729	Lyase	0.237885	9 / 7
Multidrug resistance-associated protein 1	ABCC1	P33527	CHEMBL3004	Primary active transporter	0.171979	3 / 2
Testis-specific androgen-binding protein	SHBG	P04278	CHEMBL3305	Secreted protein	0.171979	2 / 2
Carbonyl reductase [NADPH] 1	CBR1	P16152	CHEMBL5586	Enzyme	0.171979	1 / 1
Cyclooxygenase-1	PTGS1	P23219	CHEMBL221	Oxidoreductase	0.130792	12 / 13
Aldo-keto-reductase family 1 member C3	AKR1C3	P42330	CHEMBL4681	Enzyme	0.1061	0 / 7
Carboxylesterase 2	CES2	O00748	CHEMBL3180	Enzyme	0.1061	0 / 1
Phospholipase A2 group 1B	PLA2G1B	P04054	CHEMBL4426	Enzyme	0.1061	0 / 1
Beta-secretase 1	BACE1	P56817	CHEMBL4822	Protease	0.1061	121 / 14
Peroxisome proliferator-activated receptor gamma	PPARG	P37231	CHEMBL235	Nuclear receptor	0.1061	1 / 144
Matrix metalloproteinase 13	MMP13	P45452	CHEMBL280	Protease	0.0978745	162 / 2
Sodium/glucose cotransporter 2	SLC5A2	P31639	CHEMBL3884	Electrochemical transporter	0.0978745	2 / 7
Metabotropic glutamate receptor 5	GRM5	P41594	CHEMBL3227	Family C G protein-coupled receptor	0.0978745	1 / 10
Matrix metalloproteinase 12	MMP12	P39900	CHEMBL4393	Protease	0.0978745	17 / 3
Endothelin receptor ET-A	EDNRA	P25101	CHEMBL252	Family A G protein-coupled receptor	0.0978745	30 / 33
DNA polymerase beta (by homology)	POLB	P06746	CHEMBL2392	Enzyme	0.0978745	0 / 2
Phospholipase A2 group V	PLA2G5	P39877	CHEMBL4323	Enzyme	0.0978745	0 / 3
Group X secretory phospholipase A2	PLA2G10	O15496	CHEMBL4342	Enzyme	0.0978745	0 / 1
Retinoid X receptor alpha	RXRA	P19793	CHEMBL2061	Nuclear receptor	0.0978745	0 / 16
Metabotropic glutamate receptor 2 (by homology)	GRM2	Q14416	CHEMBL5137	Family C G protein-coupled receptor	0.0978745	0 / 73
Aldose reductase	AKR1B1	P15121	CHEMBL1900	Enzyme	0.0978745	72 / 46
Acyl coenzyme A:cholesterol acyltransferase	CES1	P23141	CHEMBL2265	Enzyme	0.0978745	2 / 1
Kallikrein 1	KLK1	P06870	CHEMBL2319	Protease	0.0978745	0 / 1
Kallikrein 2	KLK2	P20151	CHEMBL2442	Protease	0.0978745	0 / 1
Butyrylcholinesterase	BCHE	P06276	CHEMBL1914	Hydrolase	0.0978745	7 / 2
Acetylcholinesterase	ACHE	P22303	CHEMBL220	Hydrolase	0.0978745	13 / 22
Phospholipase A2 group IIA	PLA2G2A	P14555	CHEMBL3474	Enzyme	0.0978745	4 / 8
Serine/threonine-protein kinase Aurora-B	AURKB	Q96GD4	CHEMBL2185	Kinase	0.0978745	32 / 0
Ribosomal protein S6 kinase 1	RPS6KB1	P23443	CHEMBL4501	Kinase	0.0978745	25 / 0
Serine/threonine-protein kinase Aurora-A	AURKA	O14965	CHEMBL4722	Kinase	0.0978745	73 / 0
Neuronal acetylcholine receptor protein alpha-7 subunit	CHRNA7	P36544	CHEMBL2492	Ligand-gated ion channel	0.0978745	10 / 0
Plasminogen activator inhibitor-1	SERPINE1	P05121	CHEMBL3475	Secreted protein	0.0978745	6 / 3
Carbonic anhydrase III	CA3	P07451	CHEMBL2885	Lyase	0.0978745	0 / 3
Estradiol 17-beta-dehydrogenase 2	HSD17B2	P37059	CHEMBL2789	Enzyme	0.0978745	71 / 0
NADPH oxidase 4	NOX4	Q9NPH5	CHEMBL1250375	Enzyme	0.0978745	8 / 0
Plasminogen	PLG	P00747	CHEMBL1801	Protease	0.0978745	3 / 0
Carbonic anhydrase II	CA2	P00918	CHEMBL205	Lyase	0.0978745	88 / 4
Carbonic anhydrase I	CA1	P00915	CHEMBL261	Lyase	0.0978745	81 / 3
Cyclin-dependent kinase 2	CDK2	P24941	CHEMBL301	Kinase	0.0978745	39 / 0
Cyclin-dependent kinase 4	CDK4	P11802	CHEMBL331	Kinase	0.0978745	24 / 0
Prostanoid EP3 receptor	PTGER3	P43115	CHEMBL3710	Family A G protein-coupled receptor	0.0978745	0 / 11
Serine/threonine-protein kinase Sgk1	SGK1	O00141	CHEMBL2343	Kinase	0.0978745	2 / 0
Serine/threonine-protein kinase WEE1	WEE1	P30291	CHEMBL5491	Kinase	0.0978745	47 / 0
Cathepsin L	CTSL	P07711	CHEMBL3837	Protease	0.0978745	7 / 2
Hepatocyte nuclear factor 4-alpha	HNF4A	P41235	CHEMBL5398	Unclassified protein	0.0978745	0 / 6
Carbonic anhydrase VI	CA6	P23280	CHEMBL3025	Lyase	0.0978745	7 / 2
Carbonic anhydrase VA	CA5A	P35218	CHEMBL4789	Lyase	0.0978745	6 / 3
Aldo-keto reductase family 1 member B10	AKR1B10	O60218	CHEMBL5983	Enzyme	0.0978745	21 / 0
Hematopoietic prostaglandin D synthase	HPGDS	O60760	CHEMBL5879	Transferase	0.0978745	3 / 0
Serine/threonine-protein kinase B-raf	BRAF	P15056	CHEMBL5145	Kinase	0.0978745	32 / 0
Beta amyloid A4 protein	APP	P05067	CHEMBL2487	Membrane receptor	0.0978745	13 / 2
Cyclin-dependent kinase 2/cyclin A	CDK2 CCNA1 CCNA2	P24941 P78396 P20248	CHEMBL2094128	Other cytosolic protein	0.0978745	26 / 0
Tyrosine-protein kinase SYK	SYK	P43405	CHEMBL2599	Kinase	0.0978745	30 / 0
Hepatocyte growth factor receptor	MET	P08581	CHEMBL3717	Kinase	0.0978745	66 / 4
Prostanoid EP1 receptor	PTGER1	P34995	CHEMBL1811	Family A G protein-coupled receptor	0.0978745	0 / 15
Serine/threonine-protein kinase/endoribonuclease IRE1	ERN1	O75460	CHEMBL1163101	Enzyme	0.0978745	30 / 0
Matrix metalloproteinase 3	MMP3	P08254	CHEMBL283	Protease	0.0978745	134 / 0
Dual specificty protein kinase CLK1	CLK1	P49759	CHEMBL4224	Kinase	0.0978745	17 / 0
Apoptosis regulator Bcl-X	BCL2L1	Q07817	CHEMBL4625	Other ion channel	0.0978745	1 / 0
Dual specificity tyrosine-phosphorylation-regulated kinase 1B	DYRK1B	Q9Y463	CHEMBL5543	Kinase	0.0978745	17 / 0
Placenta growth factor	PGF	P49763	CHEMBL1697671	Unclassified protein	0.0978745	0 / 3
Vascular endothelial growth factor A	VEGFA	P15692	CHEMBL1783	Secreted protein	0.0978745	0 / 3
MAP kinase signal-integrating kinase 2	MKNK2	Q9HBH9	CHEMBL4204	Kinase	0	10 / 0
Matrix metalloproteinase 2	MMP2	P08253	CHEMBL333	Protease	0	241 / 7
Histone deacetylase 5	HDAC5	Q9UQL6	CHEMBL2563	Eraser	0	8 / 0
Histone deacetylase 7	HDAC7	Q8WUI4	CHEMBL2716	Eraser	0	15 / 0
Histone deacetylase 9	HDAC9	Q9UKV0	CHEMBL4145	Eraser	0	7 / 0
Matrix metalloproteinase 9	MMP9	P14780	CHEMBL321	Protease	0	275 / 2
Thrombopoietin receptor	MPL	P40238	CHEMBL1864	Membrane receptor	0	1 / 0
Ribosomal protein S6 kinase alpha 3	RPS6KA3	P51812	CHEMBL2345	Kinase	0	20 / 0
Protein-tyrosine phosphatase 1B	PTPN1	P18031	CHEMBL335	Phosphatase	0	18 / 22
Carbonic anhydrase XIII	CA13	Q8N1Q1	CHEMBL3912	Lyase	0	5 / 3
Carbonic anhydrase VB	CA5B	Q9Y2D0	CHEMBL3969	Lyase	0	5 / 2
Telomerase reverse transcriptase	TERT	O14746	CHEMBL2916	Enzyme	0	5 / 2
Tyrosine-protein kinase SRC	SRC	P12931	CHEMBL267	Kinase	0	25 / 3
Mu opioid receptor (by homology)	OPRM1	P35372	CHEMBL233	Family A G protein-coupled receptor	0	28 / 0
ALK tyrosine kinase receptor	ALK	Q9UM73	CHEMBL4247	Kinase	0	6 / 0
Ephrin receptor	EPHB4	P54760	CHEMBL5147	Kinase	0	24 / 0
NAD-dependent deacetylase sirtuin 2	SIRT2	Q8IXJ6	CHEMBL4462	Eraser	0	16 / 27
Carbonic anhydrase IX	CA9	Q16790	CHEMBL3594	Lyase	0	62 / 1
Serine/threonine-protein kinase Chk2	CHEK2	O96017	CHEMBL2527	Kinase	0	7 / 0
Ribosomal protein S6 kinase alpha 1	RPS6KA1	Q15418	CHEMBL2553	Kinase	0	5 / 0
Tyrosine-protein kinase LCK (by homology)	LCK	P06239	CHEMBL258	Kinase	0	29 / 0
Coagulation factor VII/tissue factor	F3	P13726	CHEMBL4081	Surface antigen	0	12 / 0
Vascular endothelial growth factor receptor 2	KDR	P35968	CHEMBL279	Kinase	0	81 / 9
Adenosine A2a receptor	ADORA2A	P29274	CHEMBL251	Family A G protein-coupled receptor	0	25 / 0
Dual-specificity tyrosine-phosphorylation regulated kinase 1A	DYRK1A	Q13627	CHEMBL2292	Kinase	0	26 / 1
Apoptosis regulator Bcl-2	BCL2	P10415	CHEMBL4860	Other ion channel	0	2 / 9

## Sheet: Quercetin
Quercetin
Target	Common name	Uniprot ID	ChEMBL ID	Target Class	Probability*	Known actives (3D/2D)
NADPH oxidase 4	NOX4	Q9NPH5	CHEMBL1250375	Enzyme	1	7 / 8
Vasopressin V2 receptor	AVPR2	P30518	CHEMBL1790	Family A G protein-coupled receptor	1	1 / 1
Aldose reductase	AKR1B1	P15121	CHEMBL1900	Enzyme	1	18 / 72
Xanthine dehydrogenase	XDH	P47989	CHEMBL1929	Oxidoreductase	1	12 / 20
Monoamine oxidase A	MAOA	P21397	CHEMBL1951	Oxidoreductase	1	4 / 14
Insulin-like growth factor I receptor	IGF1R	P08069	CHEMBL1957	Kinase	1	3 / 3
Tyrosine-protein kinase receptor FLT3	FLT3	P36888	CHEMBL1974	Kinase	1	5 / 7
Cytochrome P450 19A1	CYP19A1	P11511	CHEMBL1978	Cytochrome P450	1	5 / 18
Epidermal growth factor receptor erbB1	EGFR	P00533	CHEMBL203	Kinase	1	5 / 28
Thrombin	F2	P00734	CHEMBL204	Protease	1	11 / 3
Carbonic anhydrase II	CA2	P00918	CHEMBL205	Lyase	1	7 / 15
Serine/threonine-protein kinase PIM1	PIM1	P11309	CHEMBL2147	Kinase	1	7 / 7
Arachidonate 5-lipoxygenase	ALOX5	P09917	CHEMBL215	Oxidoreductase	1	5 / 46
Serine/threonine-protein kinase Aurora-B	AURKB	Q96GD4	CHEMBL2185	Kinase	1	3 / 4
Dopamine D4 receptor	DRD4	P21917	CHEMBL219	Family A G protein-coupled receptor	1	1 / 1
Adenosine A1 receptor (by homology)	ADORA1	P30542	CHEMBL226	Family A G protein-coupled receptor	1	6 / 23
Carbonic anhydrase VII	CA7	P43166	CHEMBL2326	Lyase	1	8 / 14
Glyoxalase I	GLO1	Q04760	CHEMBL2424	Enzyme	1	3 / 4
Myeloperoxidase	MPO	P05164	CHEMBL2439	Enzyme	1	1 / 1
PI3-kinase p85-alpha subunit	PIK3R1	P27986	CHEMBL2506	Enzyme	1	1 / 1
Adenosine A2a receptor (by homology)	ADORA2A	P29274	CHEMBL251	Family A G protein-coupled receptor	1	5 / 11
Death-associated protein kinase 1	DAPK1	P53355	CHEMBL2558	Kinase	1	2 / 2
Liver glycogen phosphorylase	PYGL	P06737	CHEMBL2568	Enzyme	1	1 / 1
Carbonic anhydrase I	CA1	P00915	CHEMBL261	Lyase	1	3 / 5
Glycogen synthase kinase-3 beta	GSK3B	P49841	CHEMBL262	Kinase	1	3 / 6
Tyrosine-protein kinase SRC	SRC	P12931	CHEMBL267	Kinase	1	2 / 10
Focal adhesion kinase 1	PTK2	Q05397	CHEMBL2695	Kinase	1	1 / 2
Estradiol 17-beta-dehydrogenase 2	HSD17B2	P37059	CHEMBL2789	Enzyme	1	8 / 3
Vascular endothelial growth factor receptor 2	KDR	P35968	CHEMBL279	Kinase	1	2 / 3
Matrix metalloproteinase 13	MMP13	P45452	CHEMBL280	Protease	1	1 / 1
Matrix metalloproteinase 3	MMP3	P08254	CHEMBL283	Protease	1	1 / 1
Carbonic anhydrase III	CA3	P07451	CHEMBL2885	Lyase	1	1 / 1
Arachidonate 15-lipoxygenase	ALOX15	P16050	CHEMBL2903	Enzyme	1	4 / 8
Multidrug resistance-associated protein 1	ABCC1	P33527	CHEMBL3004	Primary active transporter	1	7 / 11
Serine/threonine-protein kinase PLK1	PLK1	P53350	CHEMBL3024	Kinase	1	2 / 3
Carbonic anhydrase VI	CA6	P23280	CHEMBL3025	Lyase	1	1 / 1
Cyclin-dependent kinase 1	CDK1	P06493	CHEMBL308	Kinase	1	2 / 13
Matrix metalloproteinase 9	MMP9	P14780	CHEMBL321	Protease	1	2 / 2
Carbonic anhydrase XII	CA12	O43570	CHEMBL3242	Lyase	1	8 / 17
Matrix metalloproteinase 2	MMP2	P08253	CHEMBL333	Protease	1	2 / 2
Protein kinase N1	PKN1	Q16512	CHEMBL3384	Kinase	1	1 / 3
Carbonic anhydrase XIV	CA14	Q9ULX7	CHEMBL3510	Lyase	1	1 / 1
Carbonic anhydrase IX	CA9	Q16790	CHEMBL3594	Lyase	1	3 / 5
Casein kinase II alpha	CSNK2A1	P68400	CHEMBL3629	Kinase	1	3 / 2
Arachidonate 12-lipoxygenase	ALOX12	P18054	CHEMBL3687	Enzyme	1	5 / 10
Hepatocyte growth factor receptor	MET	P08581	CHEMBL3717	Kinase	1	2 / 4
Carbonic anhydrase IV	CA4	P22748	CHEMBL3729	Lyase	1	7 / 13
Serine/threonine-protein kinase NEK2	NEK2	P51955	CHEMBL3835	Kinase	1	1 / 2
Interleukin-8 receptor A	CXCR1	P25024	CHEMBL4029	Family A G protein-coupled receptor	1	1 / 1
CaM kinase II beta	CAMK2B	Q13554	CHEMBL4121	Kinase	1	1 / 2
ALK tyrosine kinase receptor	ALK	Q9UM73	CHEMBL4247	Kinase	1	2 / 4
Serine/threonine-protein kinase AKT	AKT1	P31749	CHEMBL4282	Kinase	1	1 / 4
P-glycoprotein 1	ABCB1	P08183	CHEMBL4302	Primary active transporter	1	11 / 48
Serine/threonine-protein kinase NEK6	NEK6	Q9HC98	CHEMBL4309	Kinase	1	1 / 2
Phospholipase A2 group 1B	PLA2G1B	P04054	CHEMBL4426	Enzyme	1	1 / 1
Carbonic anhydrase VA	CA5A	P35218	CHEMBL4789	Lyase	1	1 / 1
Beta-secretase 1	BACE1	P56817	CHEMBL4822	Protease	1	8 / 14
Cytochrome P450 1B1	CYP1B1	Q16678	CHEMBL4878	Cytochrome P450	1	12 / 46
Tyrosine-protein kinase receptor UFO	AXL	P30530	CHEMBL4895	Kinase	1	2 / 4
ATP-binding cassette sub-family G member 2	ABCG2	Q9UNQ0	CHEMBL5393	Primary active transporter	1	6 / 50
NUAK family SNF1-like kinase 1	NUAK1	O60285	CHEMBL5784	Kinase	1	1 / 2
Aldo-keto reductase family 1 member C2 (by homology)	AKR1C2	P52895	CHEMBL5847	Enzyme	1	1 / 1
Aldo-keto reductase family 1 member C1 (by homology)	AKR1C1	Q04828	CHEMBL5905	Enzyme	1	1 / 1
Aldo-keto-reductase family 1 member C3 (by homology)	AKR1C3	P42330	CHEMBL4681	Enzyme	1	1 / 1
Aldo-keto reductase family 1 member C4 (by homology)	AKR1C4	P17516	CHEMBL4999	Enzyme	1	1 / 1
Carbonic anhydrase XIII (by homology)	CA13	Q8N1Q1	CHEMBL3912	Lyase	1	1 / 1
Aldehyde reductase (by homology)	AKR1A1	P14550	CHEMBL2246	Enzyme	1	1 / 1
G-protein coupled receptor 35	GPR35	Q9HC97	CHEMBL1293267	Family A G protein-coupled receptor	1	2 / 4
Microtubule-associated protein tau	MAPT	P10636	CHEMBL1293224	Unclassified protein	0.680284	1 / 1
Lysine-specific demethylase 4D-like	KDM4E	B2RXH2	CHEMBL1293226	Eraser	0.680284	2 / 2
DNA topoisomerase II alpha	TOP2A	P11388	CHEMBL1806	Isomerase	0.680284	1 / 1
Insulin receptor	INSR	P06213	CHEMBL1981	Kinase	0.680284	1 / 1
Acetylcholinesterase	ACHE	P22303	CHEMBL220	Hydrolase	0.680284	4 / 27
Myosin light chain kinase, smooth muscle	MYLK	Q15746	CHEMBL2428	Kinase	0.680284	1 / 1
Tyrosine-protein kinase SYK	SYK	P43405	CHEMBL2599	Kinase	0.680284	3 / 3
PI3-kinase p110-gamma subunit	PIK3CG	P48736	CHEMBL3267	Enzyme	0.680284	3 / 1
DNA-(apurinic or apyrimidinic site) lyase	APEX1	P27695	CHEMBL5619	Enzyme	0.680284	1 / 1
Receptor-type tyrosine-protein phosphatase S	PTPRS	Q13332	CHEMBL2396508	Phosphatase	0.545872	6 / 8
Estrogen receptor beta	ESR2	Q92731	CHEMBL242	Nuclear receptor	0.545872	62 / 29
DNA-3-methyladenine glycosylase	MPG	P29372	CHEMBL3396943	Enzyme	0.545872	1 / 1
Solute carrier family 22 member 12	SLC22A12	Q96S37	CHEMBL6120	Electrochemical transporter	0.545872	4 / 1
Cyclin-dependent kinase 5/CDK5 activator 1	CDK5R1 CDK5	Q15078 Q00535	CHEMBL1907600	Kinase	0.538062	6 / 18
Cyclin-dependent kinase 1/cyclin B	CCNB3 CDK1 CCNB1 CCNB2	Q8WWL7 P06493 P14635 O95067	CHEMBL2094127	Other cytosolic protein	0.538062	4 / 9
Arginase-1 (by homology)	ARG1	P05089	CHEMBL1075097	Enzyme	0.538062	2 / 2
Cyclin-dependent kinase 6	CDK6	Q00534	CHEMBL2508	Kinase	0.498513	3 / 4
Cyclin-dependent kinase 2	CDK2	P24941	CHEMBL301	Kinase	0.498513	1 / 17
Tyrosinase	TYR	P14679	CHEMBL1973	Oxidoreductase	0.395895	2 / 3
Estradiol 17-beta-dehydrogenase 1	HSD17B1	P14061	CHEMBL3181	Enzyme	0.395895	8 / 4
Aryl hydrocarbon receptor	AHR	P35869	CHEMBL3201	Transcription factor	0.395895	1 / 1
Estrogen-related receptor alpha	ESRRA	P11474	CHEMBL3429	Nuclear receptor	0.395895	2 / 2
Beta amyloid A4 protein	APP	P05067	CHEMBL2487	Membrane receptor	0.26156	2 / 12
Poly [ADP-ribose] polymerase-1	PARP1	P09874	CHEMBL3105	Enzyme	0.26156	3 / 9
Transthyretin	TTR	P02766	CHEMBL3194	Secreted protein	0.26156	2 / 2
Matrix metalloproteinase 12	MMP12	P39900	CHEMBL4393	Protease	0.26156	1 / 1
Lymphocyte differentiation antigen CD38	CD38	P28907	CHEMBL4660	Enzyme	0.26156	2 / 3
Aldo-keto reductase family 1 member B10	AKR1B10	O60218	CHEMBL5983	Enzyme	0.26156	2 / 3
Tankyrase-2	TNKS2	Q9H2K2	CHEMBL6154	Enzyme	0.26156	4 / 12
Tankyrase-1	TNKS	O95271	CHEMBL6164	Enzyme	0.26156	4 / 28
DNA topoisomerase I (by homology)	TOP1	P11387	CHEMBL1781	Isomerase	0.26156	1 / 1
Telomerase reverse transcriptase	TERT	O14746	CHEMBL2916	Enzyme	0.198389	9 / 22

## Sheet: Quercetin 3-beta-D-galactopyran
Quercetin 3-beta-D-galactopyran
Target	Common name	Uniprot ID	ChEMBL ID	Target Class	Probability*	Known actives (3D/2D)
Aldose reductase	AKR1B1	P15121	CHEMBL1900	Enzyme	1	10 / 66
Carbonic anhydrase II	CA2	P00918	CHEMBL205	Lyase	1	3 / 10
Carbonic anhydrase VII	CA7	P43166	CHEMBL2326	Lyase	1	5 / 13
Carbonic anhydrase XII	CA12	O43570	CHEMBL3242	Lyase	1	5 / 20
Carbonic anhydrase IV	CA4	P22748	CHEMBL3729	Lyase	1	4 / 10
NADPH oxidase 4	NOX4	Q9NPH5	CHEMBL1250375	Enzyme	0.998137	1 / 7
Adrenergic receptor alpha-2	ADRA2C	P18825	CHEMBL1916	Family A G protein-coupled receptor	0.998137	2 / 2
Acetylcholinesterase	ACHE	P22303	CHEMBL220	Hydrolase	0.804529	3 / 21
Quinone reductase 2	NQO2	P16083	CHEMBL3959	Enzyme	0.578271	1 / 1
Ribosomal protein S6 kinase alpha 3	RPS6KA3	P51812	CHEMBL2345	Kinase	0.427429	5 / 19
Neuromedin-U receptor 2	NMUR2	Q9GZQ4	CHEMBL1075144	Family A G protein-coupled receptor	0.368795	1 / 1
Alpha-2a adrenergic receptor	ADRA2A	P08913	CHEMBL1867	Family A G protein-coupled receptor	0.368795	1 / 1
Cyclooxygenase-2	PTGS2	P35354	CHEMBL230	Oxidoreductase	0.159289	1 / 5
Lymphocyte differentiation antigen CD38	CD38	P28907	CHEMBL4660	Enzyme	0.134155	0 / 2
Phosphodiesterase 5A	PDE5A	O76074	CHEMBL1827	Phosphodiesterase	0.109013	0 / 6
TNF-alpha	TNF	P01375	CHEMBL1825	Secreted protein	0.100634	0 / 3
Interleukin-2	IL2	P60568	CHEMBL5880	Secreted protein	0.100634	0 / 4
Xanthine dehydrogenase	XDH	P47989	CHEMBL1929	Oxidoreductase	0.100634	3 / 18
Adenosine A1 receptor (by homology)	ADORA1	P30542	CHEMBL226	Family A G protein-coupled receptor	0.100634	0 / 14
Arachidonate 5-lipoxygenase	ALOX5	P09917	CHEMBL215	Oxidoreductase	0.100634	0 / 45
Equilibrative nucleoside transporter 1	SLC29A1	Q99808	CHEMBL1997	Electrochemical transporter	0.100634	2 / 0
Telomerase reverse transcriptase	TERT	O14746	CHEMBL2916	Enzyme	0.100634	0 / 10
Adenosine A3 receptor	ADORA3	P0DMS8	CHEMBL256	Family A G protein-coupled receptor	0	0 / 14
Plasminogen	PLG	P00747	CHEMBL1801	Protease	0	0 / 2
Voltage-gated potassium channel subunit Kv1.3	KCNA3	P22001	CHEMBL4633	Voltage-gated ion channel	0	0 / 2
ATP-binding cassette sub-family G member 2	ABCG2	Q9UNQ0	CHEMBL5393	Primary active transporter	0	0 / 38
Tyrosine-protein kinase SRC	SRC	P12931	CHEMBL267	Kinase	0	0 / 9
Beta amyloid A4 protein	APP	P05067	CHEMBL2487	Membrane receptor	0	0 / 2
Cytochrome P450 1B1	CYP1B1	Q16678	CHEMBL4878	Cytochrome P450	0	0 / 33
Induced myeloid leukemia cell differentiation protein Mcl-1	MCL1	Q07820	CHEMBL4361	Other cytosolic protein	0	0 / 1
Integrin alpha-V/beta-3	ITGAV ITGB3	P06756 P05106	CHEMBL1907598	Membrane receptor	0	31 / 0
Integrin alpha-V/beta-6	ITGAV ITGB6	P06756 P18564	CHEMBL2111416	Membrane receptor	0	18 / 0
Aldehyde dehydrogenase	ALDH2	P05091	CHEMBL1935	Oxidoreductase	0	0 / 2
Thrombin and coagulation factor X	F10	P00742	CHEMBL244	Protease	0	4 / 0
Metastin receptor	KISS1R	Q969F8	CHEMBL5413	Family A G protein-coupled receptor	0	11 / 0
Carbonic anhydrase I	CA1	P00915	CHEMBL261	Lyase	0	0 / 7
Carbonic anhydrase IX	CA9	Q16790	CHEMBL3594	Lyase	0	0 / 10
Carbonic anhydrase XIII	CA13	Q8N1Q1	CHEMBL3912	Lyase	0	0 / 3
Integrin alpha-IIb/beta-3	ITGA2B ITGB3	P08514 P05106	CHEMBL2093869	Membrane receptor	0	2 / 0
Integrin alpha-5/beta-1	ITGB1 ITGA5	P05556 P08648	CHEMBL2095226	Membrane receptor	0	2 / 0
Protein kinase C gamma	PRKCG	P05129	CHEMBL2938	Kinase	0	11 / 0
Protein kinase C delta	PRKCD	Q05655	CHEMBL2996	Kinase	0	11 / 0
Protein kinase C alpha	PRKCA	P17252	CHEMBL299	Kinase	0	10 / 0
Protein kinase C beta	PRKCB	P05771	CHEMBL3045	Kinase	0	11 / 0
Protein kinase C epsilon	PRKCE	Q02156	CHEMBL3582	Kinase	0	9 / 0
Protein kinase C eta	PRKCH	P24723	CHEMBL3616	Kinase	0	11 / 0
Heat shock protein HSP 90-beta	HSP90AB1	P08238	CHEMBL4303	Other cytosolic protein	0	1 / 0
Adenosine A2a receptor (by homology)	ADORA2A	P29274	CHEMBL251	Family A G protein-coupled receptor	0	0 / 6
Serine/threonine-protein kinase Chk2	CHEK2	O96017	CHEMBL2527	Kinase	0	2 / 0
Serine/threonine-protein kinase Chk1	CHEK1	O14757	CHEMBL4630	Kinase	0	2 / 0
Dynamin-2	DNM2	P50570	CHEMBL5812	Enzyme	0	1 / 0
Cyclin-dependent kinase 1/cyclin B1	CDK1 CCNB1	P06493 P14635	CHEMBL1907602	Other cytosolic protein	0	1 / 0
Protein kinase C (PKC)	PRKCZ	Q05513	CHEMBL3438	Kinase	0	4 / 0
cAMP-dependent protein kinase alpha-catalytic subunit	PRKACA	P17612	CHEMBL4101	Kinase	0	4 / 0
Plasminogen activator inhibitor-1	SERPINE1	P05121	CHEMBL3475	Secreted protein	0	1 / 0
Microtubule-associated protein tau	MAPT	P10636	CHEMBL1293224	Unclassified protein	0	0 / 1
Lysine-specific demethylase 4D-like	KDM4E	B2RXH2	CHEMBL1293226	Eraser	0	0 / 2
G-protein coupled receptor 35	GPR35	Q9HC97	CHEMBL1293267	Family A G protein-coupled receptor	0	0 / 2
Vasopressin V2 receptor	AVPR2	P30518	CHEMBL1790	Family A G protein-coupled receptor	0	0 / 1
DNA topoisomerase II alpha	TOP2A	P11388	CHEMBL1806	Isomerase	0	0 / 1
Monoamine oxidase A	MAOA	P21397	CHEMBL1951	Oxidoreductase	0	0 / 3
Insulin-like growth factor I receptor	IGF1R	P08069	CHEMBL1957	Kinase	0	0 / 1
Tyrosine-protein kinase receptor FLT3	FLT3	P36888	CHEMBL1974	Kinase	0	0 / 6
Cytochrome P450 19A1	CYP19A1	P11511	CHEMBL1978	Cytochrome P450	0	0 / 3
Insulin receptor	INSR	P06213	CHEMBL1981	Kinase	0	0 / 1
Epidermal growth factor receptor erbB1	EGFR	P00533	CHEMBL203	Kinase	0	0 / 11
Serine/threonine-protein kinase PIM1	PIM1	P11309	CHEMBL2147	Kinase	0	0 / 3
Serine/threonine-protein kinase Aurora-B	AURKB	Q96GD4	CHEMBL2185	Kinase	0	0 / 1
Dopamine D4 receptor	DRD4	P21917	CHEMBL219	Family A G protein-coupled receptor	0	0 / 1
Glyoxalase I	GLO1	Q04760	CHEMBL2424	Enzyme	0	0 / 4
Myosin light chain kinase, smooth muscle	MYLK	Q15746	CHEMBL2428	Kinase	0	0 / 1
Myeloperoxidase	MPO	P05164	CHEMBL2439	Enzyme	0	0 / 1
PI3-kinase p85-alpha subunit	PIK3R1	P27986	CHEMBL2506	Enzyme	0	0 / 1
Death-associated protein kinase 1	DAPK1	P53355	CHEMBL2558	Kinase	0	0 / 2
Liver glycogen phosphorylase	PYGL	P06737	CHEMBL2568	Enzyme	0	0 / 1
Tyrosine-protein kinase SYK	SYK	P43405	CHEMBL2599	Kinase	0	0 / 3
Glycogen synthase kinase-3 beta	GSK3B	P49841	CHEMBL262	Kinase	0	0 / 3
Focal adhesion kinase 1	PTK2	Q05397	CHEMBL2695	Kinase	0	0 / 1
Estradiol 17-beta-dehydrogenase 2	HSD17B2	P37059	CHEMBL2789	Enzyme	0	0 / 2
Vascular endothelial growth factor receptor 2	KDR	P35968	CHEMBL279	Kinase	0	0 / 1
Matrix metalloproteinase 13	MMP13	P45452	CHEMBL280	Protease	0	0 / 1
Matrix metalloproteinase 3	MMP3	P08254	CHEMBL283	Protease	0	0 / 1
Carbonic anhydrase III	CA3	P07451	CHEMBL2885	Lyase	0	0 / 1
Arachidonate 15-lipoxygenase	ALOX15	P16050	CHEMBL2903	Enzyme	0	0 / 4
Serine/threonine-protein kinase PLK1	PLK1	P53350	CHEMBL3024	Kinase	0	0 / 1
Carbonic anhydrase VI	CA6	P23280	CHEMBL3025	Lyase	0	0 / 1
Cyclin-dependent kinase 1	CDK1	P06493	CHEMBL308	Kinase	0	0 / 2
Matrix metalloproteinase 9	MMP9	P14780	CHEMBL321	Protease	0	0 / 2
PI3-kinase p110-gamma subunit	PIK3CG	P48736	CHEMBL3267	Enzyme	0	0 / 1
Matrix metalloproteinase 2	MMP2	P08253	CHEMBL333	Protease	0	0 / 2
Protein kinase N1	PKN1	Q16512	CHEMBL3384	Kinase	0	0 / 1
Carbonic anhydrase XIV	CA14	Q9ULX7	CHEMBL3510	Lyase	0	0 / 1
Casein kinase II alpha	CSNK2A1	P68400	CHEMBL3629	Kinase	0	0 / 2
Arachidonate 12-lipoxygenase	ALOX12	P18054	CHEMBL3687	Enzyme	0	0 / 3
Hepatocyte growth factor receptor	MET	P08581	CHEMBL3717	Kinase	0	0 / 1
Serine/threonine-protein kinase NEK2	NEK2	P51955	CHEMBL3835	Kinase	0	0 / 1
Interleukin-8 receptor A	CXCR1	P25024	CHEMBL4029	Family A G protein-coupled receptor	0	0 / 1
CaM kinase II beta	CAMK2B	Q13554	CHEMBL4121	Kinase	0	0 / 1
ALK tyrosine kinase receptor	ALK	Q9UM73	CHEMBL4247	Kinase	0	0 / 1
Serine/threonine-protein kinase AKT	AKT1	P31749	CHEMBL4282	Kinase	0	0 / 2

## Sheet: 6
6-[3-[(3,4-dimethoxyphenyl)methyl]-4-methoxy-2-(methoxymethyl)butyl]-4-methoxy-1,3-benzodioxole
Target	Common name	Uniprot ID	ChEMBL ID	Target Class	Probability*	Known actives (3D/2D)
Leucine-rich repeat serine/threonine-protein kinase 2	LRRK2	Q5S007	CHEMBL1075104	Kinase	0.118883	163 / 0
Heat shock protein HSP 90-beta	HSP90AB1	P08238	CHEMBL4303	Other cytosolic protein	0.118883	47 / 0
Arachidonate 12-lipoxygenase	ALOX12	P18054	CHEMBL3687	Enzyme	0.118883	2 / 8
Serotonin 1a (5-HT1a) receptor	HTR1A	P08908	CHEMBL214	Family A G protein-coupled receptor	0.118883	157 / 7
CDC7/DBF4 (Cell division cycle 7-related protein kinase/Activator of S phase kinase)	DBF4 CDC7	Q9UBU7 O00311	CHEMBL2111377	Kinase	0.118883	6 / 0
Hexokinase type IV	GCK	P35557	CHEMBL3820	Enzyme	0.118883	114 / 0
MAP kinase p38 alpha	MAPK14	Q16539	CHEMBL260	Kinase	0.118883	281 / 0
Histamine H3 receptor	HRH3	Q9Y5N1	CHEMBL264	Family A G protein-coupled receptor	0.118883	48 / 0
Monoamine oxidase B	MAOB	P27338	CHEMBL2039	Oxidoreductase	0.118883	12 / 11
Receptor protein-tyrosine kinase erbB-2	ERBB2	P04626	CHEMBL1824	Kinase	0.118883	101 / 0
Glycogen synthase kinase-3 beta	GSK3B	P49841	CHEMBL262	Kinase	0.118883	171 / 0
Glycogen synthase kinase-3 alpha	GSK3A	P49840	CHEMBL2850	Kinase	0.118883	19 / 0
TNF-alpha	TNF	P01375	CHEMBL1825	Secreted protein	0.118883	16 / 0
dUTP pyrophosphatase	DUT	P33316	CHEMBL5203	Enzyme	0.118883	72 / 0
c-Jun N-terminal kinase 2	MAPK9	P45984	CHEMBL4179	Kinase	0.118883	60 / 3
Glycine transporter 1	SLC6A9	P48067	CHEMBL2337	Electrochemical transporter	0.118883	84 / 0
Glycine transporter 2	SLC6A5	Q9Y345	CHEMBL3060	Electrochemical transporter	0.118883	11 / 0
Serine/threonine-protein kinase Chk1	CHEK1	O14757	CHEMBL4630	Kinase	0.118883	113 / 0
PI3-kinase p110-delta subunit	PIK3CD	O00329	CHEMBL3130	Enzyme	0.118883	359 / 0
PI3-kinase p110-beta subunit	PIK3CB	P42338	CHEMBL3145	Enzyme	0.118883	385 / 0
PI3-kinase p110-gamma subunit	PIK3CG	P48736	CHEMBL3267	Enzyme	0.118883	309 / 0
PI3-kinase p110-alpha subunit	PIK3CA	P42336	CHEMBL4005	Enzyme	0.118883	1070 / 0
Platelet-derived growth factor receptor beta	PDGFRB	P09619	CHEMBL1913	Kinase	0.118883	33 / 0
Stem cell growth factor receptor	KIT	P10721	CHEMBL1936	Kinase	0.118883	62 / 0
MAP kinase-activated protein kinase 2	MAPKAPK2	P49137	CHEMBL2208	Kinase	0.118883	30 / 0
Mammalian target of Rapamycin (mTORC1)	FKBP1A MTOR	P62942 P42345	CHEMBL2221341	Kinase	0.118883	28 / 0
Serine/threonine-protein kinase mTOR	MTOR	P42345	CHEMBL2842	Kinase	0.118883	549 / 0
CDK8/Cyclin C	CCNC CDK8	P24863 P49336	CHEMBL3038474	Kinase	0.118883	18 / 0
Poly [ADP-ribose] polymerase-1	PARP1	P09874	CHEMBL3105	Enzyme	0.118883	97 / 0
MAP kinase ERK2	MAPK1	P28482	CHEMBL4040	Kinase	0.118883	228 / 0
Cell division protein kinase 8	CDK8	P49336	CHEMBL5719	Kinase	0.118883	26 / 0
Epidermal growth factor receptor erbB1	EGFR	P00533	CHEMBL203	Kinase	0.118883	405 / 0
Phosphodiesterase 7A	PDE7A	Q13946	CHEMBL3012	Phosphodiesterase	0.118883	35 / 0
G-protein coupled receptor kinase 2	GRK2	P25098	CHEMBL4079	Kinase	0.118883	6 / 0
Tyrosine-protein kinase receptor FLT3	FLT3	P36888	CHEMBL1974	Kinase	0.118883	105 / 0
Tyrosine-protein kinase JAK1	JAK1	P23458	CHEMBL2835	Kinase	0.118883	234 / 0
Tyrosine-protein kinase JAK2	JAK2	O60674	CHEMBL2971	Kinase	0.118883	332 / 0
Cyclin-dependent kinase 2	CDK2	P24941	CHEMBL301	Kinase	0.118883	170 / 0
Tyrosine-protein kinase TYK2	TYK2	P29597	CHEMBL3553	Kinase	0.118883	82 / 0
Phosphodiesterase 10A	PDE10A	Q9Y233	CHEMBL4409	Phosphodiesterase	0.118883	736 / 0
P2X purinoceptor 3	P2RX3	P56373	CHEMBL2998	Ligand-gated ion channel	0.118883	143 / 0
CDK2/Cyclin A	CCNA2 CDK2	P20248 P24941	CHEMBL3038469	Kinase	0.118883	31 / 0
Cyclin-dependent kinase 6	CDK6	Q00534	CHEMBL2508	Kinase	0.118883	9 / 0
Cyclin-dependent kinase 1	CDK1	P06493	CHEMBL308	Kinase	0.118883	181 / 0
Cyclin-dependent kinase 4	CDK4	P11802	CHEMBL331	Kinase	0.118883	38 / 0
Phosphodiesterase 9A	PDE9A	O76083	CHEMBL3535	Phosphodiesterase	0.118883	61 / 0
Cyclin-dependent kinase 4/cyclin D1	CCND1 CDK4	P24385 P11802	CHEMBL1907601	Kinase	0.118883	52 / 0
Serine/threonine-protein kinase Aurora-B	AURKB	Q96GD4	CHEMBL2185	Kinase	0.118883	123 / 0
Tyrosine-protein kinase TIE-2	TEK	Q02763	CHEMBL4128	Kinase	0.118883	32 / 0
Serine/threonine-protein kinase Aurora-A	AURKA	O14965	CHEMBL4722	Kinase	0.118883	204 / 0
p53-binding protein Mdm-2	MDM2	Q00987	CHEMBL5023	Other nuclear protein	0.118883	260 / 0
Dopamine transporter	SLC6A3	Q01959	CHEMBL238	Electrochemical transporter	0.118883	312 / 40
Cyclin-dependent kinase 5/CDK5 activator 1	CDK5R1 CDK5	Q15078 Q00535	CHEMBL1907600	Kinase	0.118883	101 / 0
Troponin, cardiac muscle	TNNC1 TNNT2 TNNI3	P63316 P45379 P19429	CHEMBL2095202	Unclassified protein	0.118883	5 / 0
MAP kinase signal-integrating kinase 2	MKNK2	Q9HBH9	CHEMBL4204	Kinase	0.118883	24 / 0
Phosphodiesterase 1C	PDE1C	Q14123	CHEMBL4619	Phosphodiesterase	0.118883	17 / 0
Macrophage colony stimulating factor receptor (by homology)	CSF1R	P07333	CHEMBL1844	Kinase	0.118883	84 / 0
Proteasome subunit beta type-8	PSMB8	P28062	CHEMBL5620	Protease	0.118883	19 / 0
Tyrosine-protein kinase SYK	SYK	P43405	CHEMBL2599	Kinase	0.118883	269 / 0
Interleukin-1 receptor-associated kinase 4	IRAK4	Q9NWZ3	CHEMBL3778	Kinase	0.118883	35 / 0
Complement factor D	CFD	P00746	CHEMBL2176771	Protease	0.118883	110 / 0
Tyrosine-protein kinase ITK/TSK	ITK	Q08881	CHEMBL2959	Kinase	0.118883	51 / 0
MAP kinase ERK1	MAPK3	P27361	CHEMBL3385	Kinase	0.118883	16 / 0
Inhibitor of nuclear factor kappa B kinase epsilon subunit	IKBKE	Q14164	CHEMBL3529	Kinase	0.118883	20 / 0
Serine/threonine-protein kinase TBK1	TBK1	Q9UHD2	CHEMBL5408	Kinase	0.118883	27 / 0
3-phosphoinositide dependent protein kinase-1	PDPK1	O15530	CHEMBL2534	Kinase	0.118883	57 / 0
Ribosomal protein S6 kinase 1	RPS6KB1	P23443	CHEMBL4501	Kinase	0.118883	57 / 0
Beta-secretase 1	BACE1	P56817	CHEMBL4822	Protease	0.118883	882 / 0
Peptidyl-prolyl cis-trans isomerase FKBP5	FKBP5	Q13451	CHEMBL2052031	Enzyme	0.118883	6 / 0
Protein kinase C gamma	PRKCG	P05129	CHEMBL2938	Kinase	0.118883	33 / 0
Protein kinase C alpha	PRKCA	P17252	CHEMBL299	Kinase	0.118883	118 / 0
Protein kinase C beta	PRKCB	P05771	CHEMBL3045	Kinase	0.118883	47 / 0
Protein kinase C theta	PRKCQ	Q04759	CHEMBL3920	Kinase	0.118883	50 / 0
Cyclin-dependent kinase 2/cyclin E	CCNE2 CDK2 CCNE1	O96020 P24941 P24864	CHEMBL2094126	Other cytosolic protein	0.118883	54 / 0
Cyclin-dependent kinase 2/cyclin A	CDK2 CCNA1 CCNA2	P24941 P78396 P20248	CHEMBL2094128	Other cytosolic protein	0.118883	87 / 0
Tyrosine-protein kinase JAK3	JAK3	P52333	CHEMBL2148	Kinase	0.118883	249 / 0
Potassium channel subfamily K member 3	KCNK3	O14649	CHEMBL2321613	Voltage-gated ion channel	0.118883	32 / 0
Thrombin and coagulation factor X	F10	P00742	CHEMBL244	Protease	0.118883	219 / 0
Liver glycogen phosphorylase	PYGL	P06737	CHEMBL2568	Enzyme	0.118883	100 / 0
Peregrin	BRPF1	P55201	CHEMBL3132741	Reader	0.118883	25 / 0
Fibroblast growth factor receptor 1	FGFR1	P11362	CHEMBL3650	Kinase	0.118883	51 / 0
Alkaline phosphatase, tissue-nonspecific isozyme	ALPL	P05186	CHEMBL5979	Enzyme	0.118883	8 / 0
PI3-kinase p110-alpha/p85-alpha	PIK3CA PIK3R1	P42336 P27986	CHEMBL2111367	Enzyme	0.118883	31 / 0
PI3-kinase p110-delta/p85-alpha	PIK3CD PIK3R1	O00329 P27986	CHEMBL2111432	Enzyme	0.118883	3 / 0
Calcitonin gene-related peptide type 1 receptor	CALCRL	Q16602	CHEMBL3798	Family B G protein-coupled receptor	0.118883	28 / 0
Nitric oxide synthase, inducible	NOS2	P35228	CHEMBL4481	Enzyme	0.118883	14 / 0
c-Jun N-terminal kinase 1	MAPK8	P45983	CHEMBL2276	Kinase	0.118883	110 / 0
Probable G-protein coupled receptor 139	GPR139	Q6DWJ6	CHEMBL3632455	Family A G protein-coupled receptor	0.118883	1 / 0
Gamma-secretase	PSEN2 PSENEN NCSTN APH1A PSEN1 APH1B	P49810 Q9NZ42 Q92542 Q96BI3 P49768 Q8WW43	CHEMBL2094135	Protease	0.118883	143 / 0
Dual-specificity tyrosine-phosphorylation regulated kinase 1A	DYRK1A	Q13627	CHEMBL2292	Kinase	0.118883	74 / 0
Phosphodiesterase 3	PDE3A	Q14432	CHEMBL241	Phosphodiesterase	0.118883	20 / 0
Phosphodiesterase 3B	PDE3B	Q13370	CHEMBL290	Phosphodiesterase	0.118883	9 / 0
Dual specificity protein kinase CLK4	CLK4	Q9HAZ1	CHEMBL4203	Kinase	0.118883	25 / 0
Dual specificty protein kinase CLK1	CLK1	P49759	CHEMBL4224	Kinase	0.118883	24 / 0
Dual specificity protein kinase CLK2	CLK2	P49760	CHEMBL4225	Kinase	0.118883	17 / 0
Dual specificity protein kinase CLK3	CLK3	P49761	CHEMBL4226	Kinase	0.118883	14 / 0
Ephrin receptor	EPHB4	P54760	CHEMBL5147	Kinase	0.118883	38 / 0
Dual specificity tyrosine-phosphorylation-regulated kinase 1B	DYRK1B	Q9Y463	CHEMBL5543	Kinase	0.118883	16 / 0
Phosphodiesterase 5A	PDE5A	O76074	CHEMBL1827	Phosphodiesterase	0.118883	76 / 0
c-Jun N-terminal kinase 3	MAPK10	P53779	CHEMBL2637	Kinase	0.118883	88 / 0

## Sheet: 7
SwissTargetPrediction	2-(3,4-dihydroxyphenyl)-5,7-dihydroxy-3-[(2S,3R,4S,5S,6R)-3,4,5-trihydroxy-6-[[(2S,3R,4S,5R)-3,4,5-trihydroxyoxan-2-yl]oxymethyl]oxan-2-yl]oxychromen-4-one
Target	Common name	Uniprot ID	ChEMBL ID	Target Class	Probability*	Known actives (3D/2D)
Neuromedin-U receptor 2	NMUR2	Q9GZQ4	CHEMBL1075144	Family A G protein-coupled receptor	0.997091	1 / 1
Alpha-2a adrenergic receptor	ADRA2A	P08913	CHEMBL1867	Family A G protein-coupled receptor	0.997091	1 / 1
Adrenergic receptor alpha-2	ADRA2C	P18825	CHEMBL1916	Family A G protein-coupled receptor	0.997091	2 / 2
Acetylcholinesterase	ACHE	P22303	CHEMBL220	Hydrolase	0.997091	2 / 20
Aldose reductase	AKR1B1	P15121	CHEMBL1900	Enzyme	0.424369	11 / 65
NADPH oxidase 4	NOX4	Q9NPH5	CHEMBL1250375	Enzyme	0.379489	1 / 6
Carbonic anhydrase II	CA2	P00918	CHEMBL205	Lyase	0.334372	3 / 10
Carbonic anhydrase VII	CA7	P43166	CHEMBL2326	Lyase	0.334372	4 / 13
Carbonic anhydrase XII	CA12	O43570	CHEMBL3242	Lyase	0.334372	4 / 20
Carbonic anhydrase IV	CA4	P22748	CHEMBL3729	Lyase	0.334372	4 / 10
Ribosomal protein S6 kinase alpha 3	RPS6KA3	P51812	CHEMBL2345	Kinase	0.163278	6 / 19
Quinone reductase 2	NQO2	P16083	CHEMBL3959	Enzyme	0.15429	1 / 1
Xanthine dehydrogenase	XDH	P47989	CHEMBL1929	Oxidoreductase	0.118247	2 / 16
Lymphocyte differentiation antigen CD38	CD38	P28907	CHEMBL4660	Enzyme	0.100215	0 / 2
Cyclooxygenase-2	PTGS2	P35354	CHEMBL230	Oxidoreductase	0.0912088	1 / 4
TNF-alpha	TNF	P01375	CHEMBL1825	Secreted protein	0.0822215	0 / 3
Interleukin-2	IL2	P60568	CHEMBL5880	Secreted protein	0.0822215	0 / 4
Adenosine A1 receptor (by homology)	ADORA1	P30542	CHEMBL226	Family A G protein-coupled receptor	0.0822215	0 / 13
Arachidonate 5-lipoxygenase	ALOX5	P09917	CHEMBL215	Oxidoreductase	0.0822215	0 / 45
Phosphodiesterase 5A	PDE5A	O76074	CHEMBL1827	Phosphodiesterase	0.0822215	1 / 6
Telomerase reverse transcriptase	TERT	O14746	CHEMBL2916	Enzyme	0.0822215	0 / 6
Adenosine A3 receptor	ADORA3	P0DMS8	CHEMBL256	Family A G protein-coupled receptor	0	0 / 13
Plasminogen	PLG	P00747	CHEMBL1801	Protease	0	0 / 2
Equilibrative nucleoside transporter 1	SLC29A1	Q99808	CHEMBL1997	Electrochemical transporter	0	2 / 0
ATP-binding cassette sub-family G member 2	ABCG2	Q9UNQ0	CHEMBL5393	Primary active transporter	0	0 / 37
Cytochrome P450 1B1	CYP1B1	Q16678	CHEMBL4878	Cytochrome P450	0	0 / 32
Voltage-gated potassium channel subunit Kv1.3	KCNA3	P22001	CHEMBL4633	Voltage-gated ion channel	0	0 / 2
Tyrosine-protein kinase SRC	SRC	P12931	CHEMBL267	Kinase	0	0 / 9
Beta amyloid A4 protein	APP	P05067	CHEMBL2487	Membrane receptor	0	0 / 2
Squalene monooxygenase (by homology)	SQLE	Q14534	CHEMBL3592	Enzyme	0	2 / 0
Tumour suppressor p53/oncoprotein Mdm2	TP53	P04637	CHEMBL4096	Transcription factor	0	1 / 0
Transitional endoplasmic reticulum ATPase	VCP	P55072	CHEMBL1075145	Primary active transporter	0	1 / 0
Troponin, cardiac muscle	TNNC1 TNNT2 TNNI3	P63316 P45379 P19429	CHEMBL2095202	Unclassified protein	0	1 / 0
Estrogen receptor alpha	ESR1	P03372	CHEMBL206	Nuclear receptor	0	1 / 0
Induced myeloid leukemia cell differentiation protein Mcl-1	MCL1	Q07820	CHEMBL4361	Other cytosolic protein	0	0 / 1
Aldehyde dehydrogenase	ALDH2	P05091	CHEMBL1935	Oxidoreductase	0	0 / 2
Carbonic anhydrase I	CA1	P00915	CHEMBL261	Lyase	0	0 / 7
Carbonic anhydrase IX	CA9	Q16790	CHEMBL3594	Lyase	0	0 / 10
Carbonic anhydrase XIII	CA13	Q8N1Q1	CHEMBL3912	Lyase	0	0 / 3
Plasminogen activator inhibitor-1	SERPINE1	P05121	CHEMBL3475	Secreted protein	0	2 / 0
Epidermal growth factor receptor erbB1	EGFR	P00533	CHEMBL203	Kinase	0	0 / 11
Thrombin and coagulation factor X	F10	P00742	CHEMBL244	Protease	0	2 / 0
Adenosine A2a receptor (by homology)	ADORA2A	P29274	CHEMBL251	Family A G protein-coupled receptor	0	0 / 5
Tyrosyl-DNA phosphodiesterase 1	TDP1	Q9NUW8	CHEMBL1075138	Enzyme	0	1 / 0
Protein kinase C gamma	PRKCG	P05129	CHEMBL2938	Kinase	0	11 / 0
Protein kinase C delta	PRKCD	Q05655	CHEMBL2996	Kinase	0	12 / 0
Protein kinase C alpha	PRKCA	P17252	CHEMBL299	Kinase	0	12 / 0
Protein kinase C beta	PRKCB	P05771	CHEMBL3045	Kinase	0	12 / 0
Protein kinase C (PKC)	PRKCZ	Q05513	CHEMBL3438	Kinase	0	4 / 0
Protein kinase C epsilon	PRKCE	Q02156	CHEMBL3582	Kinase	0	12 / 0
Protein kinase C eta	PRKCH	P24723	CHEMBL3616	Kinase	0	12 / 0
cAMP-dependent protein kinase alpha-catalytic subunit	PRKACA	P17612	CHEMBL4101	Kinase	0	3 / 0
Microtubule-associated protein tau	MAPT	P10636	CHEMBL1293224	Unclassified protein	0	0 / 1
Lysine-specific demethylase 4D-like	KDM4E	B2RXH2	CHEMBL1293226	Eraser	0	0 / 1
G-protein coupled receptor 35	GPR35	Q9HC97	CHEMBL1293267	Family A G protein-coupled receptor	0	0 / 2
Vasopressin V2 receptor	AVPR2	P30518	CHEMBL1790	Family A G protein-coupled receptor	0	0 / 1
DNA topoisomerase II alpha	TOP2A	P11388	CHEMBL1806	Isomerase	0	0 / 1
Monoamine oxidase A	MAOA	P21397	CHEMBL1951	Oxidoreductase	0	0 / 2
Insulin-like growth factor I receptor	IGF1R	P08069	CHEMBL1957	Kinase	0	0 / 1
Tyrosine-protein kinase receptor FLT3	FLT3	P36888	CHEMBL1974	Kinase	0	0 / 5
Cytochrome P450 19A1	CYP19A1	P11511	CHEMBL1978	Cytochrome P450	0	0 / 2
Insulin receptor	INSR	P06213	CHEMBL1981	Kinase	0	0 / 1
Thrombin	F2	P00734	CHEMBL204	Protease	0	0 / 2
Serine/threonine-protein kinase PIM1	PIM1	P11309	CHEMBL2147	Kinase	0	0 / 3
Serine/threonine-protein kinase Aurora-B	AURKB	Q96GD4	CHEMBL2185	Kinase	0	0 / 1
Dopamine D4 receptor	DRD4	P21917	CHEMBL219	Family A G protein-coupled receptor	0	0 / 1
Glyoxalase I	GLO1	Q04760	CHEMBL2424	Enzyme	0	0 / 4
Myosin light chain kinase, smooth muscle	MYLK	Q15746	CHEMBL2428	Kinase	0	0 / 1
Myeloperoxidase	MPO	P05164	CHEMBL2439	Enzyme	0	0 / 1
PI3-kinase p85-alpha subunit	PIK3R1	P27986	CHEMBL2506	Enzyme	0	0 / 1
Death-associated protein kinase 1	DAPK1	P53355	CHEMBL2558	Kinase	0	0 / 2
Liver glycogen phosphorylase	PYGL	P06737	CHEMBL2568	Enzyme	0	0 / 1
Tyrosine-protein kinase SYK	SYK	P43405	CHEMBL2599	Kinase	0	0 / 2
Glycogen synthase kinase-3 beta	GSK3B	P49841	CHEMBL262	Kinase	0	0 / 2
Focal adhesion kinase 1	PTK2	Q05397	CHEMBL2695	Kinase	0	0 / 1
Estradiol 17-beta-dehydrogenase 2	HSD17B2	P37059	CHEMBL2789	Enzyme	0	0 / 2
Vascular endothelial growth factor receptor 2	KDR	P35968	CHEMBL279	Kinase	0	0 / 1
Matrix metalloproteinase 13	MMP13	P45452	CHEMBL280	Protease	0	0 / 1
Matrix metalloproteinase 3	MMP3	P08254	CHEMBL283	Protease	0	0 / 1
Carbonic anhydrase III	CA3	P07451	CHEMBL2885	Lyase	0	0 / 1
Arachidonate 15-lipoxygenase	ALOX15	P16050	CHEMBL2903	Enzyme	0	0 / 3
Serine/threonine-protein kinase PLK1	PLK1	P53350	CHEMBL3024	Kinase	0	0 / 1
Carbonic anhydrase VI	CA6	P23280	CHEMBL3025	Lyase	0	0 / 1
Cyclin-dependent kinase 1	CDK1	P06493	CHEMBL308	Kinase	0	0 / 1
Matrix metalloproteinase 9	MMP9	P14780	CHEMBL321	Protease	0	0 / 2
PI3-kinase p110-gamma subunit	PIK3CG	P48736	CHEMBL3267	Enzyme	0	0 / 1
Matrix metalloproteinase 2	MMP2	P08253	CHEMBL333	Protease	0	0 / 2
Protein kinase N1	PKN1	Q16512	CHEMBL3384	Kinase	0	0 / 1
Carbonic anhydrase XIV	CA14	Q9ULX7	CHEMBL3510	Lyase	0	0 / 1
Casein kinase II alpha	CSNK2A1	P68400	CHEMBL3629	Kinase	0	0 / 1
Arachidonate 12-lipoxygenase	ALOX12	P18054	CHEMBL3687	Enzyme	0	0 / 2
Hepatocyte growth factor receptor	MET	P08581	CHEMBL3717	Kinase	0	0 / 1
Serine/threonine-protein kinase NEK2	NEK2	P51955	CHEMBL3835	Kinase	0	0 / 1
Interleukin-8 receptor A	CXCR1	P25024	CHEMBL4029	Family A G protein-coupled receptor	0	0 / 1
CaM kinase II beta	CAMK2B	Q13554	CHEMBL4121	Kinase	0	0 / 1
ALK tyrosine kinase receptor	ALK	Q9UM73	CHEMBL4247	Kinase	0	0 / 1
Serine/threonine-protein kinase AKT	AKT1	P31749	CHEMBL4282	Kinase	0	0 / 1
Serine/threonine-protein kinase NEK6	NEK6	Q9HC98	CHEMBL4309	Kinase	0	0 / 1
Phospholipase A2 group 1B	PLA2G1B	P04054	CHEMBL4426	Enzyme	0	0 / 1
Carbonic anhydrase VA	CA5A	P35218	CHEMBL4789	Lyase	0	0 / 1

## Sheet: afzelin
afzelin
Target	Common name	Uniprot ID	ChEMBL ID	Target Class	Probability*	Known actives (3D/2D)
Quinone reductase 2	NQO2	P16083	CHEMBL3959	Enzyme	0.995023	1 / 1
Aldose reductase	AKR1B1	P15121	CHEMBL1900	Enzyme	0.922888	21 / 67
Carbonic anhydrase II	CA2	P00918	CHEMBL205	Lyase	0.922888	16 / 12
Carbonic anhydrase VII	CA7	P43166	CHEMBL2326	Lyase	0.922888	7 / 14
Carbonic anhydrase XII	CA12	O43570	CHEMBL3242	Lyase	0.922888	9 / 22
Carbonic anhydrase IV	CA4	P22748	CHEMBL3729	Lyase	0.922888	6 / 11
Acetylcholinesterase	ACHE	P22303	CHEMBL220	Hydrolase	0.812641	3 / 18
Ribosomal protein S6 kinase alpha 3	RPS6KA3	P51812	CHEMBL2345	Kinase	0.786569	9 / 19
NADPH oxidase 4	NOX4	Q9NPH5	CHEMBL1250375	Enzyme	0.601427	3 / 7
Adrenergic receptor alpha-2	ADRA2C	P18825	CHEMBL1916	Family A G protein-coupled receptor	0.601427	2 / 2
Neuromedin-U receptor 2	NMUR2	Q9GZQ4	CHEMBL1075144	Family A G protein-coupled receptor	0.175187	1 / 1
Alpha-2a adrenergic receptor	ADRA2A	P08913	CHEMBL1867	Family A G protein-coupled receptor	0.175187	1 / 1
Lymphocyte differentiation antigen CD38	CD38	P28907	CHEMBL4660	Enzyme	0.134972	0 / 2
Cyclooxygenase-2	PTGS2	P35354	CHEMBL230	Oxidoreductase	0.126929	1 / 5
Phosphodiesterase 5A	PDE5A	O76074	CHEMBL1827	Phosphodiesterase	0.118883	2 / 6
Adenosine A1 receptor (by homology)	ADORA1	P30542	CHEMBL226	Family A G protein-coupled receptor	0.118883	0 / 14
Xanthine dehydrogenase	XDH	P47989	CHEMBL1929	Oxidoreductase	0.118883	4 / 19
TNF-alpha	TNF	P01375	CHEMBL1825	Secreted protein	0.118883	0 / 3
Interleukin-2	IL2	P60568	CHEMBL5880	Secreted protein	0.118883	0 / 4
Equilibrative nucleoside transporter 1	SLC29A1	Q99808	CHEMBL1997	Electrochemical transporter	0.118883	2 / 0
Arachidonate 5-lipoxygenase	ALOX5	P09917	CHEMBL215	Oxidoreductase	0.118883	0 / 31
Adenosine A3 receptor	ADORA3	P0DMS8	CHEMBL256	Family A G protein-coupled receptor	0	0 / 15
Voltage-gated potassium channel subunit Kv1.3	KCNA3	P22001	CHEMBL4633	Voltage-gated ion channel	0	0 / 3
Thrombin and coagulation factor X	F10	P00742	CHEMBL244	Protease	0	20 / 0
Serine/threonine-protein kinase RAF	RAF1	P04049	CHEMBL1906	Kinase	0	1 / 0
Heat shock protein HSP 90-beta	HSP90AB1	P08238	CHEMBL4303	Other cytosolic protein	0	13 / 0
Integrin alpha-V/beta-3	ITGAV ITGB3	P06756 P05106	CHEMBL1907598	Membrane receptor	0	37 / 0
Integrin alpha-IIb/beta-3	ITGA2B ITGB3	P08514 P05106	CHEMBL2093869	Membrane receptor	0	2 / 0
Integrin alpha-5/beta-1	ITGB1 ITGA5	P05556 P08648	CHEMBL2095226	Membrane receptor	0	2 / 0
Metastin receptor	KISS1R	Q969F8	CHEMBL5413	Family A G protein-coupled receptor	0	27 / 0
Plasminogen	PLG	P00747	CHEMBL1801	Protease	0	0 / 2
ATP-binding cassette sub-family G member 2	ABCG2	Q9UNQ0	CHEMBL5393	Primary active transporter	0	0 / 40
Aldehyde dehydrogenase	ALDH2	P05091	CHEMBL1935	Oxidoreductase	0	0 / 2
Serine/threonine-protein kinase Chk2	CHEK2	O96017	CHEMBL2527	Kinase	0	30 / 0
Serine/threonine-protein kinase Chk1	CHEK1	O14757	CHEMBL4630	Kinase	0	18 / 0
Integrin alpha-V/beta-6	ITGAV ITGB6	P06756 P18564	CHEMBL2111416	Membrane receptor	0	22 / 0
Catechol O-methyltransferase	COMT	P21964	CHEMBL2023	Transferase	0	3 / 0
Cyclin-dependent kinase 1/cyclin B1	CDK1 CCNB1	P06493 P14635	CHEMBL1907602	Other cytosolic protein	0	8 / 0
Carbonic anhydrase XIII	CA13	Q8N1Q1	CHEMBL3912	Lyase	0	0 / 3
PI3-kinase p110-alpha subunit	PIK3CA	P42336	CHEMBL4005	Enzyme	0	5 / 0
Protein kinase C gamma	PRKCG	P05129	CHEMBL2938	Kinase	0	22 / 0
Protein kinase C delta	PRKCD	Q05655	CHEMBL2996	Kinase	0	23 / 0
Protein kinase C alpha	PRKCA	P17252	CHEMBL299	Kinase	0	24 / 0
Protein kinase C beta	PRKCB	P05771	CHEMBL3045	Kinase	0	24 / 0
Protein kinase C epsilon	PRKCE	Q02156	CHEMBL3582	Kinase	0	24 / 0
Protein kinase C eta	PRKCH	P24723	CHEMBL3616	Kinase	0	23 / 0
Heat shock protein HSP 90-alpha	HSP90AA1	P07900	CHEMBL3880	Other cytosolic protein	0	12 / 0
Adrenergic receptor beta	ADRB2	P07550	CHEMBL210	Family A G protein-coupled receptor	0	16 / 0
Beta-1 adrenergic receptor	ADRB1	P08588	CHEMBL213	Family A G protein-coupled receptor	0	16 / 0
Dual specificity protein phosphatase 3	DUSP3	P51452	CHEMBL2635	Phosphatase	0	1 / 0
Protein kinase C (PKC)	PRKCZ	Q05513	CHEMBL3438	Kinase	0	8 / 0
cAMP-dependent protein kinase alpha-catalytic subunit	PRKACA	P17612	CHEMBL4101	Kinase	0	7 / 0
Troponin, cardiac muscle	TNNC1 TNNT2 TNNI3	P63316 P45379 P19429	CHEMBL2095202	Unclassified protein	0	1 / 0
CDC7/DBF4 (Cell division cycle 7-related protein kinase/Activator of S phase kinase)	CDC7	O00311	CHEMBL5443	Kinase	0	1 / 0
Egl nine homolog 1	EGLN1	Q9GZT9	CHEMBL5697	Oxidoreductase	0	5 / 0
Cyclin-dependent kinase 4/cyclin D1	CCND1 CDK4	P24385 P11802	CHEMBL1907601	Kinase	0	8 / 0
Cyclin-dependent kinase 2/cyclin E	CCNE2 CDK2 CCNE1	O96020 P24941 P24864	CHEMBL2094126	Other cytosolic protein	0	8 / 0
Serine/threonine-protein kinase WEE1	WEE1	P30291	CHEMBL5491	Kinase	0	2 / 0
Squalene monooxygenase (by homology)	SQLE	Q14534	CHEMBL3592	Enzyme	0	1 / 0
Plasminogen activator inhibitor-1	SERPINE1	P05121	CHEMBL3475	Secreted protein	0	1 / 0
Apoptosis regulator Bcl-X	BCL2L1	Q07817	CHEMBL4625	Other ion channel	0	4 / 0
Apoptosis regulator Bcl-2	BCL2	P10415	CHEMBL4860	Other ion channel	0	4 / 0
Sigma opioid receptor	SIGMAR1	Q99720	CHEMBL287	Membrane receptor	0	0 / 50
Dopamine D2 receptor (by homology)	DRD2	P14416	CHEMBL217	Family A G protein-coupled receptor	0	0 / 46
Pyruvate dehydrogenase kinase isoform 1	PDK1	Q15118	CHEMBL4766	Kinase	0	2 / 0
Dihydroorotate dehydrogenase	DHODH	Q02127	CHEMBL1966	Oxidoreductase	0	2 / 0
Dual specificity phosphatase Cdc25B	CDC25B	P30305	CHEMBL4804	Phosphatase	0	1 / 0
Telomerase reverse transcriptase	TERT	O14746	CHEMBL2916	Enzyme	0	1 / 8
Dynamin-2	DNM2	P50570	CHEMBL5812	Enzyme	0	1 / 0
Cyclin-dependent kinase 2/cyclin A	CDK2 CCNA1 CCNA2	P24941 P78396 P20248	CHEMBL2094128	Other cytosolic protein	0	2 / 0
Cyclin-dependent kinase 4	CDK4	P11802	CHEMBL331	Kinase	0	3 / 0
NAD-dependent deacetylase sirtuin 1	SIRT1	Q96EB6	CHEMBL4506	Eraser	0	4 / 0
Bcl-2-related protein A1	BCL2A1	Q16548	CHEMBL6044	Unclassified protein	0	3 / 0
Glucagon receptor	GCGR	P47871	CHEMBL1985	Family B G protein-coupled receptor	0	3 / 0
Leucine-rich repeat serine/threonine-protein kinase 2	LRRK2	Q5S007	CHEMBL1075104	Kinase	0	1 / 0
G protein-coupled receptor kinase 7	GRK7	Q8WTQ7	CHEMBL1075133	Kinase	0	1 / 0
Homeodomain-interacting protein kinase 4	HIPK4	Q8NE63	CHEMBL1075167	Kinase	0	1 / 0
Serine/threonine-protein kinase TAO2	TAOK2	Q9UL54	CHEMBL1075195	Kinase	0	1 / 0
Serine/threonine-protein kinase MAK	MAK	P20794	CHEMBL1163106	Kinase	0	1 / 0
Cyclin-dependent kinase-like 5	CDKL5	O76039	CHEMBL1163112	Kinase	0	1 / 0
Serine/threonine-protein kinase ICK	ICK	Q9UPZ9	CHEMBL1163126	Kinase	0	1 / 0
Serine/threonine-protein kinase VRK2	VRK2	Q86Y07	CHEMBL1649059	Enzyme	0	1 / 0
Phosphatidylinositol-5-phosphate 4-kinase type-2 gamma	PIP4K2C	Q8TBX8	CHEMBL1770034	Enzyme	0	1 / 0
Cyclin-dependent kinase 13	CDK13	Q14004	CHEMBL1795192	Enzyme	0	1 / 0
Macrophage colony stimulating factor receptor	CSF1R	P07333	CHEMBL1844	Kinase	0	1 / 0
Tyrosine-protein kinase ABL	ABL1	P00519	CHEMBL1862	Kinase	0	1 / 0
Cyclin-dependent kinase 2/cyclin E1	CCNE1 CDK2	P24864 P24941	CHEMBL1907605	Kinase	0	1 / 0
Phosphatidylinositol-4-phosphate 5-kinase type-1 gamma	PIP5K1C	O60331	CHEMBL1908383	Enzyme	0	1 / 0
Dual serine/threonine and tyrosine protein kinase	DSTYK	Q6XUX3	CHEMBL1908386	Enzyme	0	1 / 0
Platelet-derived growth factor receptor alpha	PDGFRA	P16234	CHEMBL2007	Kinase	0	1 / 0
Ephrin type-A receptor 2	EPHA2	P29317	CHEMBL2068	Kinase	0	1 / 0
Cyclin-dependent kinase 4/cyclin D	CCND3 CCND1 CDK4 CCND2	P30281 P24385 P11802 P30279	CHEMBL2095942	Other cytosolic protein	0	1 / 0
Dual specificity mitogen-activated protein kinase kinase 3	MAP2K3	P46734	CHEMBL2109	Kinase	0	1 / 0
Cyclin-dependent kinase 7/ cyclin H	CDK7 CCNH	P50613 P51946	CHEMBL2111288	Other cytosolic protein	0	1 / 0
CDK9/cyclin T1	CDK9 CCNT1	P50750 O60563	CHEMBL2111389	Other cytosolic protein	0	1 / 0
Tyrosine-protein kinase JAK3	JAK3	P52333	CHEMBL2148	Kinase	0	1 / 0
c-Jun N-terminal kinase 1	MAPK8	P45983	CHEMBL2276	Kinase	0	1 / 0
Dual-specificity tyrosine-phosphorylation regulated kinase 1A	DYRK1A	Q13627	CHEMBL2292	Kinase	0	1 / 0
Phosphorylase kinase gamma subunit 2	PHKG2	P15735	CHEMBL2349	Kinase	0	1 / 0
Casein kinase I gamma 1	CSNK1G1	Q9HCP0	CHEMBL2426	Kinase	0	1 / 0

## Sheet: Guajaverin
Guajaverin
Target	Common name	Uniprot ID	ChEMBL ID	Target Class	Probability*	Known actives (3D/2D)
Aldose reductase (by homology)	AKR1B1	P15121	CHEMBL1900	Enzyme	1	10 / 67
Carbonic anhydrase II	CA2	P00918	CHEMBL205	Lyase	0.858755	4 / 12
Carbonic anhydrase VII	CA7	P43166	CHEMBL2326	Lyase	0.858755	5 / 14
Carbonic anhydrase XII	CA12	O43570	CHEMBL3242	Lyase	0.858755	5 / 22
Carbonic anhydrase IV	CA4	P22748	CHEMBL3729	Lyase	0.858755	4 / 11
NADPH oxidase 4	NOX4	Q9NPH5	CHEMBL1250375	Enzyme	0.830721	2 / 7
Adrenergic receptor alpha-2	ADRA2C	P18825	CHEMBL1916	Family A G protein-coupled receptor	0.830721	2 / 2
Acetylcholinesterase	ACHE	P22303	CHEMBL220	Hydrolase	0.770431	4 / 19
Quinone reductase 2	NQO2	P16083	CHEMBL3959	Enzyme	0.617659	1 / 1
Ribosomal protein S6 kinase alpha 3	RPS6KA3	P51812	CHEMBL2345	Kinase	0.384308	5 / 19
Neuromedin-U receptor 2	NMUR2	Q9GZQ4	CHEMBL1075144	Family A G protein-coupled receptor	0.19929	1 / 1
Alpha-2a adrenergic receptor	ADRA2A	P08913	CHEMBL1867	Family A G protein-coupled receptor	0.19929	1 / 1
Cyclooxygenase-2	PTGS2	P35354	CHEMBL230	Oxidoreductase	0.143015	1 / 5
Lymphocyte differentiation antigen CD38	CD38	P28907	CHEMBL4660	Enzyme	0.134972	0 / 2
Phosphodiesterase 5A	PDE5A	O76074	CHEMBL1827	Phosphodiesterase	0.126929	0 / 6
TNF-alpha	TNF	P01375	CHEMBL1825	Secreted protein	0.118883	0 / 3
Interleukin-2	IL2	P60568	CHEMBL5880	Secreted protein	0.118883	0 / 4
Adenosine A1 receptor (by homology)	ADORA1	P30542	CHEMBL226	Family A G protein-coupled receptor	0.118883	0 / 14
Xanthine dehydrogenase	XDH	P47989	CHEMBL1929	Oxidoreductase	0.118883	5 / 19
Arachidonate 5-lipoxygenase	ALOX5	P09917	CHEMBL215	Oxidoreductase	0.118883	0 / 46
Equilibrative nucleoside transporter 1	SLC29A1	Q99808	CHEMBL1997	Electrochemical transporter	0.118883	2 / 0
Telomerase reverse transcriptase	TERT	O14746	CHEMBL2916	Enzyme	0.118883	0 / 11
Adenosine A3 receptor	ADORA3	P0DMS8	CHEMBL256	Family A G protein-coupled receptor	0	0 / 15
Plasminogen	PLG	P00747	CHEMBL1801	Protease	0	0 / 2
Voltage-gated potassium channel subunit Kv1.3	KCNA3	P22001	CHEMBL4633	Voltage-gated ion channel	0	0 / 3
ATP-binding cassette sub-family G member 2	ABCG2	Q9UNQ0	CHEMBL5393	Primary active transporter	0	0 / 40
Tyrosine-protein kinase SRC	SRC	P12931	CHEMBL267	Kinase	0	0 / 9
Beta amyloid A4 protein	APP	P05067	CHEMBL2487	Membrane receptor	0	0 / 2
Induced myeloid leukemia cell differentiation protein Mcl-1	MCL1	Q07820	CHEMBL4361	Other cytosolic protein	0	0 / 1
Metastin receptor	KISS1R	Q969F8	CHEMBL5413	Family A G protein-coupled receptor	0	12 / 0
Thrombin and coagulation factor X	F10	P00742	CHEMBL244	Protease	0	6 / 0
Integrin alpha-V/beta-3	ITGAV ITGB3	P06756 P05106	CHEMBL1907598	Membrane receptor	0	35 / 0
Integrin alpha-V/beta-6	ITGAV ITGB6	P06756 P18564	CHEMBL2111416	Membrane receptor	0	22 / 0
Heat shock protein HSP 90-beta	HSP90AB1	P08238	CHEMBL4303	Other cytosolic protein	0	3 / 0
Integrin alpha-IIb/beta-3	ITGA2B ITGB3	P08514 P05106	CHEMBL2093869	Membrane receptor	0	2 / 0
Integrin alpha-5/beta-1	ITGB1 ITGA5	P05556 P08648	CHEMBL2095226	Membrane receptor	0	2 / 0
Aldehyde dehydrogenase	ALDH2	P05091	CHEMBL1935	Oxidoreductase	0	0 / 2
Serine/threonine-protein kinase Chk2	CHEK2	O96017	CHEMBL2527	Kinase	0	10 / 0
Serine/threonine-protein kinase Chk1	CHEK1	O14757	CHEMBL4630	Kinase	0	7 / 0
Vasopressin V2 receptor	AVPR2	P30518	CHEMBL1790	Family A G protein-coupled receptor	0	0 / 1
Monoamine oxidase A	MAOA	P21397	CHEMBL1951	Oxidoreductase	0	0 / 3
Insulin-like growth factor I receptor	IGF1R	P08069	CHEMBL1957	Kinase	0	0 / 1
Cytochrome P450 19A1	CYP19A1	P11511	CHEMBL1978	Cytochrome P450	0	0 / 5
Epidermal growth factor receptor erbB1	EGFR	P00533	CHEMBL203	Kinase	0	0 / 11
Serine/threonine-protein kinase PIM1	PIM1	P11309	CHEMBL2147	Kinase	0	0 / 3
Serine/threonine-protein kinase Aurora-B	AURKB	Q96GD4	CHEMBL2185	Kinase	0	0 / 1
Dopamine D4 receptor	DRD4	P21917	CHEMBL219	Family A G protein-coupled receptor	0	0 / 1
Myeloperoxidase	MPO	P05164	CHEMBL2439	Enzyme	0	0 / 1
PI3-kinase p85-alpha subunit	PIK3R1	P27986	CHEMBL2506	Enzyme	0	0 / 1
Death-associated protein kinase 1	DAPK1	P53355	CHEMBL2558	Kinase	0	0 / 2
Liver glycogen phosphorylase	PYGL	P06737	CHEMBL2568	Enzyme	0	0 / 1
Carbonic anhydrase I	CA1	P00915	CHEMBL261	Lyase	0	0 / 9
Glycogen synthase kinase-3 beta	GSK3B	P49841	CHEMBL262	Kinase	0	0 / 3
Focal adhesion kinase 1	PTK2	Q05397	CHEMBL2695	Kinase	0	0 / 1
Estradiol 17-beta-dehydrogenase 2	HSD17B2	P37059	CHEMBL2789	Enzyme	0	0 / 2
Vascular endothelial growth factor receptor 2	KDR	P35968	CHEMBL279	Kinase	0	0 / 1
Matrix metalloproteinase 13	MMP13	P45452	CHEMBL280	Protease	0	0 / 1
Matrix metalloproteinase 3	MMP3	P08254	CHEMBL283	Protease	0	0 / 1
Carbonic anhydrase III	CA3	P07451	CHEMBL2885	Lyase	0	0 / 1
Arachidonate 15-lipoxygenase	ALOX15	P16050	CHEMBL2903	Enzyme	0	0 / 4
Serine/threonine-protein kinase PLK1	PLK1	P53350	CHEMBL3024	Kinase	0	0 / 1
Carbonic anhydrase VI	CA6	P23280	CHEMBL3025	Lyase	0	0 / 1
Cyclin-dependent kinase 1	CDK1	P06493	CHEMBL308	Kinase	0	0 / 2
Matrix metalloproteinase 9	MMP9	P14780	CHEMBL321	Protease	0	0 / 2
Matrix metalloproteinase 2	MMP2	P08253	CHEMBL333	Protease	0	0 / 2
Protein kinase N1	PKN1	Q16512	CHEMBL3384	Kinase	0	0 / 1
Carbonic anhydrase XIV	CA14	Q9ULX7	CHEMBL3510	Lyase	0	0 / 1
Carbonic anhydrase IX	CA9	Q16790	CHEMBL3594	Lyase	0	0 / 12
Casein kinase II alpha	CSNK2A1	P68400	CHEMBL3629	Kinase	0	0 / 2
Arachidonate 12-lipoxygenase	ALOX12	P18054	CHEMBL3687	Enzyme	0	0 / 3
Hepatocyte growth factor receptor	MET	P08581	CHEMBL3717	Kinase	0	0 / 1
Serine/threonine-protein kinase NEK2	NEK2	P51955	CHEMBL3835	Kinase	0	0 / 1
Carbonic anhydrase XIII (by homology)	CA13	Q8N1Q1	CHEMBL3912	Lyase	0	0 / 3
Interleukin-8 receptor A	CXCR1	P25024	CHEMBL4029	Family A G protein-coupled receptor	0	0 / 1
CaM kinase II beta	CAMK2B	Q13554	CHEMBL4121	Kinase	0	0 / 1
ALK tyrosine kinase receptor	ALK	Q9UM73	CHEMBL4247	Kinase	0	0 / 1
Serine/threonine-protein kinase AKT	AKT1	P31749	CHEMBL4282	Kinase	0	0 / 3
Serine/threonine-protein kinase NEK6	NEK6	Q9HC98	CHEMBL4309	Kinase	0	0 / 1
Phospholipase A2 group 1B	PLA2G1B	P04054	CHEMBL4426	Enzyme	0	0 / 1
Carbonic anhydrase VA	CA5A	P35218	CHEMBL4789	Lyase	0	0 / 1
Tyrosine-protein kinase receptor UFO	AXL	P30530	CHEMBL4895	Kinase	0	0 / 1
NUAK family SNF1-like kinase 1	NUAK1	O60285	CHEMBL5784	Kinase	0	0 / 1
Aldo-keto reductase family 1 member C2 (by homology)	AKR1C2	P52895	CHEMBL5847	Enzyme	0	0 / 1
Aldo-keto reductase family 1 member C1 (by homology)	AKR1C1	Q04828	CHEMBL5905	Enzyme	0	0 / 1
Aldo-keto-reductase family 1 member C3 (by homology)	AKR1C3	P42330	CHEMBL4681	Enzyme	0	0 / 1
Aldo-keto reductase family 1 member C4 (by homology)	AKR1C4	P17516	CHEMBL4999	Enzyme	0	0 / 1
Aldehyde reductase (by homology)	AKR1A1	P14550	CHEMBL2246	Enzyme	0	0 / 1
Protein kinase C gamma	PRKCG	P05129	CHEMBL2938	Kinase	0	13 / 0
Protein kinase C delta	PRKCD	Q05655	CHEMBL2996	Kinase	0	13 / 0
Protein kinase C alpha	PRKCA	P17252	CHEMBL299	Kinase	0	13 / 0
Protein kinase C beta	PRKCB	P05771	CHEMBL3045	Kinase	0	13 / 0
Protein kinase C epsilon	PRKCE	Q02156	CHEMBL3582	Kinase	0	12 / 0
Protein kinase C eta	PRKCH	P24723	CHEMBL3616	Kinase	0	13 / 0
Catechol O-methyltransferase	COMT	P21964	CHEMBL2023	Transferase	0	1 / 0
Inhibitor of nuclear factor kappa B kinase beta subunit	IKBKB	O14920	CHEMBL1991	Kinase	0	3 / 0
Serine/threonine-protein kinase RAF	RAF1	P04049	CHEMBL1906	Kinase	0	1 / 0
Cyclin-dependent kinase 1/cyclin B1	CDK1 CCNB1	P06493 P14635	CHEMBL1907602	Other cytosolic protein	0	1 / 0
Protein kinase C (PKC)	PRKCZ	Q05513	CHEMBL3438	Kinase	0	5 / 0
cAMP-dependent protein kinase alpha-catalytic subunit	PRKACA	P17612	CHEMBL4101	Kinase	0	4 / 0
Heat shock protein HSP 90-alpha	HSP90AA1	P07900	CHEMBL3880	Other cytosolic protein	0	2 / 0

## Sheet: 10
3-[(2S,3R,4S,5S,6R)-4,5-dihydroxy-6-(hydroxymethyl)-3-[(2S,3R,4S,5R)-3,4,5-trihydroxyoxan-2-yl]oxyoxan-2-yl]oxy-2-(3,4-dihydroxyphenyl)-5-hydroxy-7-methoxychromen-4-one
Target	Common name	Uniprot ID	ChEMBL ID	Target Class	Probability*	Known actives (3D/2D)
Neuromedin-U receptor 2	NMUR2	Q9GZQ4	CHEMBL1075144	Family A G protein-coupled receptor	0.564559	1 / 1
Alpha-2a adrenergic receptor	ADRA2A	P08913	CHEMBL1867	Family A G protein-coupled receptor	0.564559	1 / 1
Adrenergic receptor alpha-2	ADRA2C	P18825	CHEMBL1916	Family A G protein-coupled receptor	0.564559	2 / 2
Acetylcholinesterase	ACHE	P22303	CHEMBL220	Hydrolase	0.564559	2 / 19
Carbonic anhydrase VII	CA7	P43166	CHEMBL2326	Lyase	0.276812	5 / 13
Carbonic anhydrase XII	CA12	O43570	CHEMBL3242	Lyase	0.276812	5 / 20
Carbonic anhydrase IV	CA4	P22748	CHEMBL3729	Lyase	0.276812	4 / 10
Aldose reductase	AKR1B1	P15121	CHEMBL1900	Enzyme	0.2573	12 / 65
Carbonic anhydrase II	CA2	P00918	CHEMBL205	Lyase	0.238572	3 / 10
NADPH oxidase 4	NOX4	Q9NPH5	CHEMBL1250375	Enzyme	0.200261	1 / 6
Quinone reductase 2	NQO2	P16083	CHEMBL3959	Enzyme	0.152396	1 / 1
Ribosomal protein S6 kinase alpha 3	RPS6KA3	P51812	CHEMBL2345	Kinase	0.142774	4 / 19
Cyclooxygenase-2	PTGS2	P35354	CHEMBL230	Oxidoreductase	0.0948793	1 / 4
Lymphocyte differentiation antigen CD38	CD38	P28907	CHEMBL4660	Enzyme	0.0853032	0 / 2
Xanthine dehydrogenase	XDH	P47989	CHEMBL1929	Oxidoreductase	0.0853032	2 / 16
TNF-alpha	TNF	P01375	CHEMBL1825	Secreted protein	0.0661304	0 / 3
Interleukin-2	IL2	P60568	CHEMBL5880	Secreted protein	0.0661304	0 / 4
Adenosine A1 receptor (by homology)	ADORA1	P30542	CHEMBL226	Family A G protein-coupled receptor	0.0661304	0 / 13
Phosphodiesterase 5A	PDE5A	O76074	CHEMBL1827	Phosphodiesterase	0.0661304	1 / 6
Arachidonate 5-lipoxygenase	ALOX5	P09917	CHEMBL215	Oxidoreductase	0.0661304	0 / 45
Transitional endoplasmic reticulum ATPase	VCP	P55072	CHEMBL1075145	Primary active transporter	0.0661304	1 / 0
Troponin, cardiac muscle	TNNC1 TNNT2 TNNI3	P63316 P45379 P19429	CHEMBL2095202	Unclassified protein	0.0661304	1 / 0
Tumour suppressor p53/oncoprotein Mdm2	TP53	P04637	CHEMBL4096	Transcription factor	0.0661304	2 / 0
Telomerase reverse transcriptase	TERT	O14746	CHEMBL2916	Enzyme	0.0661304	0 / 6
Squalene monooxygenase (by homology)	SQLE	Q14534	CHEMBL3592	Enzyme	0.0661304	3 / 0
Equilibrative nucleoside transporter 1	SLC29A1	Q99808	CHEMBL1997	Electrochemical transporter	0	2 / 0
Adenosine A3 receptor	ADORA3	P0DMS8	CHEMBL256	Family A G protein-coupled receptor	0	0 / 13
Plasminogen	PLG	P00747	CHEMBL1801	Protease	0	0 / 2
Cytochrome P450 1B1	CYP1B1	Q16678	CHEMBL4878	Cytochrome P450	0	0 / 32
ATP-binding cassette sub-family G member 2	ABCG2	Q9UNQ0	CHEMBL5393	Primary active transporter	0	0 / 36
Protein kinase C gamma	PRKCG	P05129	CHEMBL2938	Kinase	0	49 / 0
Protein kinase C delta	PRKCD	Q05655	CHEMBL2996	Kinase	0	54 / 0
Protein kinase C alpha	PRKCA	P17252	CHEMBL299	Kinase	0	55 / 0
Protein kinase C beta	PRKCB	P05771	CHEMBL3045	Kinase	0	60 / 0
Protein kinase C (PKC)	PRKCZ	Q05513	CHEMBL3438	Kinase	0	8 / 0
Protein kinase C epsilon	PRKCE	Q02156	CHEMBL3582	Kinase	0	51 / 0
Protein kinase C eta	PRKCH	P24723	CHEMBL3616	Kinase	0	52 / 0
Plasminogen activator inhibitor-1	SERPINE1	P05121	CHEMBL3475	Secreted protein	0	1 / 0
Voltage-gated potassium channel subunit Kv1.3	KCNA3	P22001	CHEMBL4633	Voltage-gated ion channel	0	0 / 2
cAMP-dependent protein kinase alpha-catalytic subunit	PRKACA	P17612	CHEMBL4101	Kinase	0	18 / 0
Thrombin and coagulation factor X	F10	P00742	CHEMBL244	Protease	0	2 / 0
Estrogen receptor alpha	ESR1	P03372	CHEMBL206	Nuclear receptor	0	1 / 0
Kallikrein 1	KLK1	P06870	CHEMBL2319	Protease	0	1 / 0
Kallikrein 2	KLK2	P20151	CHEMBL2442	Protease	0	1 / 0
Tyrosine-protein kinase SRC	SRC	P12931	CHEMBL267	Kinase	0	0 / 9
Dual specificity protein phosphatase 3	DUSP3	P51452	CHEMBL2635	Phosphatase	0	1 / 0
G protein-coupled receptor kinase 6	GRK6	P43250	CHEMBL6144	Kinase	0	1 / 0
Aldehyde dehydrogenase	ALDH2	P05091	CHEMBL1935	Oxidoreductase	0	0 / 2
Epidermal growth factor receptor erbB1	EGFR	P00533	CHEMBL203	Kinase	0	0 / 11
Beta amyloid A4 protein	APP	P05067	CHEMBL2487	Membrane receptor	0	0 / 2
Tyrosine-protein kinase LCK	LCK	P06239	CHEMBL258	Kinase	0	1 / 0
Multidrug resistance-associated protein 1	ABCC1	P33527	CHEMBL3004	Primary active transporter	0	0 / 9
P-glycoprotein 1 (by homology)	ABCB1	P08183	CHEMBL4302	Primary active transporter	0	0 / 26
Induced myeloid leukemia cell differentiation protein Mcl-1	MCL1	Q07820	CHEMBL4361	Other cytosolic protein	0	0 / 1
Carbonic anhydrase I	CA1	P00915	CHEMBL261	Lyase	0	0 / 7
Carbonic anhydrase IX	CA9	Q16790	CHEMBL3594	Lyase	0	0 / 10
Carbonic anhydrase XIII	CA13	Q8N1Q1	CHEMBL3912	Lyase	0	0 / 3
Adenosine A2a receptor (by homology)	ADORA2A	P29274	CHEMBL251	Family A G protein-coupled receptor	0	0 / 5
Microtubule-associated protein tau	MAPT	P10636	CHEMBL1293224	Unclassified protein	0	0 / 1
Lysine-specific demethylase 4D-like	KDM4E	B2RXH2	CHEMBL1293226	Eraser	0	0 / 1
G-protein coupled receptor 35	GPR35	Q9HC97	CHEMBL1293267	Family A G protein-coupled receptor	0	0 / 2
Vasopressin V2 receptor	AVPR2	P30518	CHEMBL1790	Family A G protein-coupled receptor	0	0 / 1
DNA topoisomerase II alpha	TOP2A	P11388	CHEMBL1806	Isomerase	0	0 / 1
Monoamine oxidase A	MAOA	P21397	CHEMBL1951	Oxidoreductase	0	0 / 2
Insulin-like growth factor I receptor	IGF1R	P08069	CHEMBL1957	Kinase	0	0 / 1
Tyrosine-protein kinase receptor FLT3	FLT3	P36888	CHEMBL1974	Kinase	0	0 / 5
Cytochrome P450 19A1	CYP19A1	P11511	CHEMBL1978	Cytochrome P450	0	0 / 2
Insulin receptor	INSR	P06213	CHEMBL1981	Kinase	0	0 / 1
Thrombin	F2	P00734	CHEMBL204	Protease	0	0 / 2
Serine/threonine-protein kinase PIM1	PIM1	P11309	CHEMBL2147	Kinase	0	0 / 3
Serine/threonine-protein kinase Aurora-B	AURKB	Q96GD4	CHEMBL2185	Kinase	0	0 / 1
Dopamine D4 receptor	DRD4	P21917	CHEMBL219	Family A G protein-coupled receptor	0	0 / 1
Glyoxalase I	GLO1	Q04760	CHEMBL2424	Enzyme	0	0 / 4
Myosin light chain kinase, smooth muscle	MYLK	Q15746	CHEMBL2428	Kinase	0	0 / 1
Myeloperoxidase	MPO	P05164	CHEMBL2439	Enzyme	0	0 / 1
PI3-kinase p85-alpha subunit	PIK3R1	P27986	CHEMBL2506	Enzyme	0	0 / 1
Death-associated protein kinase 1	DAPK1	P53355	CHEMBL2558	Kinase	0	0 / 2
Liver glycogen phosphorylase	PYGL	P06737	CHEMBL2568	Enzyme	0	0 / 1
Tyrosine-protein kinase SYK	SYK	P43405	CHEMBL2599	Kinase	0	0 / 2
Glycogen synthase kinase-3 beta	GSK3B	P49841	CHEMBL262	Kinase	0	0 / 2
Focal adhesion kinase 1	PTK2	Q05397	CHEMBL2695	Kinase	0	0 / 1
Estradiol 17-beta-dehydrogenase 2	HSD17B2	P37059	CHEMBL2789	Enzyme	0	0 / 2
Vascular endothelial growth factor receptor 2	KDR	P35968	CHEMBL279	Kinase	0	0 / 1
Matrix metalloproteinase 13	MMP13	P45452	CHEMBL280	Protease	0	0 / 1
Matrix metalloproteinase 3	MMP3	P08254	CHEMBL283	Protease	0	0 / 1
Carbonic anhydrase III	CA3	P07451	CHEMBL2885	Lyase	0	0 / 1
Arachidonate 15-lipoxygenase	ALOX15	P16050	CHEMBL2903	Enzyme	0	0 / 3
Serine/threonine-protein kinase PLK1	PLK1	P53350	CHEMBL3024	Kinase	0	0 / 1
Carbonic anhydrase VI	CA6	P23280	CHEMBL3025	Lyase	0	0 / 1
Cyclin-dependent kinase 1	CDK1	P06493	CHEMBL308	Kinase	0	0 / 1
Matrix metalloproteinase 9	MMP9	P14780	CHEMBL321	Protease	0	0 / 2
PI3-kinase p110-gamma subunit	PIK3CG	P48736	CHEMBL3267	Enzyme	0	0 / 1
Matrix metalloproteinase 2	MMP2	P08253	CHEMBL333	Protease	0	0 / 2
Protein kinase N1	PKN1	Q16512	CHEMBL3384	Kinase	0	0 / 1
Carbonic anhydrase XIV	CA14	Q9ULX7	CHEMBL3510	Lyase	0	0 / 1
Casein kinase II alpha	CSNK2A1	P68400	CHEMBL3629	Kinase	0	0 / 1
Arachidonate 12-lipoxygenase	ALOX12	P18054	CHEMBL3687	Enzyme	0	0 / 2
Hepatocyte growth factor receptor	MET	P08581	CHEMBL3717	Kinase	0	0 / 1
Serine/threonine-protein kinase NEK2	NEK2	P51955	CHEMBL3835	Kinase	0	0 / 1
Interleukin-8 receptor A	CXCR1	P25024	CHEMBL4029	Family A G protein-coupled receptor	0	0 / 1

[truncated: 38 more sheets: 11, 12, 13, 1-(4-methoxyphenyl)ethanone, 16, Ellagic acid, 18, isorhamnetin-3-O-glucoside, Spiraeoside, Isorhamnetin 3-galactoside, 22, 23, 24, 25, Naringin, Isoquercitin, 28, 29, 30, 31 …]
